# Supplementary material
Source: ML conference proceedings conference paper supplement (https://proceedings.mlr.press/v80/liu18e.html)
Supplement: Supplementary file [file liu18e-supp.pdf]

## A. Experimental Results from Synthetic Datasets

In this section we include the simulation results on synthetic datasets from using two different anomaly detectors, Isolation Forest and LODA in table 1-3 and 4-6 respectively. For using LODA, when training it on the nominal dataset, we build 1 000 random projections, and each of them is built using a bootstrap resample of the nominal dataset. After finishing building all projections, we calculate the anomaly score for each point in nominal dataset only using the projections that didn't use this point, and calculate the anomaly scores for mixture dataset,  $G_0$  and  $G_a$  using all the projections. For all cases, we include results from targeting on different recalls which are 98%, 95% and 90%. In table 1-6, the oracle FPR column is the mean of 100 oracle FPRs in each setting.

In table 7, we include the results we used for plotting figure 2. The results are the 1st quartile, median and 3rd quartile of FPR from experiments using Iforest with target recall 95%. Here the oracle FPR column is the median of 100 oracle FPRs.

## B. Experimental Results from UCI and Image Datasets

In this section we include results of performance on UCI benchmarks, MNIST and Tiny Imagenet and Tables 8-22 illustrate the results. The experimental protocol is similar to synthetic datasets and two state of the art anomaly detectors Isolation forest, LODA are applied. For Isolation forest we train Forest with 1000 trees on nominal dataset and use out of bag estimates of this dataset to estimate the nominal datasets anomaly score distribution. For LODA we build 1000 projections and similar to Isolation forest we get anomaly score for each point in nominal dataset using the projections that didn't use this point. Tables 11-16 illustrate the results of LODA for 6 different datasets for varying values of  $\eta$  and report the observed recall, False positive rate averaged over 100 runs of each experiment. Tables 17-22 report the results for Isolation Forest and it can be observed the performance of both LODA, Isolation Forest are similar.

For Image datasets we follow the same protocol as UCI for MNIST and apply Isolation Forest on the input image but for Tiny Imagenet the anomaly scores are obtained differently. We first train a Wide Residual Network (40-2) classifier on the 200 nominal classes of Tiny Imagenet and apply baseline method (Hendrycks & Gimpel, 2017) on validation data to get the nominal dataset distribution and later apply the same method on the mixture dataset which will have  $\alpha$  proportion of aliens which are basically from 800 held out classes. Tables 8-10 illustrate the results for these datasets for target recall of 98%, 95% and 90%.

**Open Category Detection with PAC Guarantees**

Table 1.  $n^*$ , recall (i.e. alien detection rate) and false positive rate from experiments using 9-dimensional normal data, 98%, iForest

| $\alpha$ | Basic CDF |         |                   |                     |        | Iso CDF           |                     |        |
|----------|-----------|---------|-------------------|---------------------|--------|-------------------|---------------------|--------|
|          | $n$       | $n^*$   | Recall            | False Positive Rate |        | Recall            | False Positive Rate |        |
|          |           |         | Recall $\pm$ CI   | FPR $\pm$ CI        | Oracle | Recall $\pm$ CI   | FPR $\pm$ CI        | Oracle |
| 0.01     | 100       | 247818  | 0.710 $\pm$ 0.033 | 0.033 $\pm$ 0.027   | 0.102  | 0.929 $\pm$ 0.029 | 0.512 $\pm$ 0.080   | 0.102  |
|          | 500       | 1167215 | 0.862 $\pm$ 0.019 | 0.033 $\pm$ 0.024   | 0.042  | 0.972 $\pm$ 0.016 | 0.543 $\pm$ 0.079   | 0.042  |
|          | 1000      | 1829649 | 0.884 $\pm$ 0.015 | 0.031 $\pm$ 0.024   | 0.036  | 0.980 $\pm$ 0.009 | 0.574 $\pm$ 0.080   | 0.036  |
|          | 5000      | 4236646 | 0.920 $\pm$ 0.010 | 0.060 $\pm$ 0.038   | 0.039  | 0.985 $\pm$ 0.007 | 0.506 $\pm$ 0.079   | 0.039  |
|          | 10000     | 6363404 | 0.932 $\pm$ 0.009 | 0.065 $\pm$ 0.034   | 0.037  | 0.984 $\pm$ 0.007 | 0.520 $\pm$ 0.080   | 0.037  |
| 0.05     | 100       | 23373   | 0.826 $\pm$ 0.027 | 0.088 $\pm$ 0.037   | 0.101  | 0.950 $\pm$ 0.022 | 0.502 $\pm$ 0.081   | 0.101  |
|          | 500       | 239656  | 0.939 $\pm$ 0.009 | 0.064 $\pm$ 0.032   | 0.042  | 0.979 $\pm$ 0.007 | 0.465 $\pm$ 0.081   | 0.042  |
|          | 1000      | 259309  | 0.940 $\pm$ 0.008 | 0.046 $\pm$ 0.025   | 0.037  | 0.977 $\pm$ 0.007 | 0.477 $\pm$ 0.085   | 0.037  |
|          | 5000      | 1067189 | 0.961 $\pm$ 0.005 | 0.083 $\pm$ 0.039   | 0.039  | 0.984 $\pm$ 0.005 | 0.411 $\pm$ 0.080   | 0.039  |
|          | 10000     | 1536752 | 0.965 $\pm$ 0.004 | 0.063 $\pm$ 0.026   | 0.037  | 0.987 $\pm$ 0.004 | 0.434 $\pm$ 0.076   | 0.037  |
| 0.10     | 100       | 20178   | 0.907 $\pm$ 0.017 | 0.105 $\pm$ 0.033   | 0.100  | 0.977 $\pm$ 0.010 | 0.549 $\pm$ 0.075   | 0.100  |
|          | 500       | 107381  | 0.951 $\pm$ 0.007 | 0.071 $\pm$ 0.035   | 0.042  | 0.985 $\pm$ 0.005 | 0.482 $\pm$ 0.080   | 0.042  |
|          | 1000      | 196205  | 0.960 $\pm$ 0.005 | 0.062 $\pm$ 0.023   | 0.037  | 0.982 $\pm$ 0.005 | 0.419 $\pm$ 0.081   | 0.037  |
|          | 5000      | 456821  | 0.970 $\pm$ 0.004 | 0.075 $\pm$ 0.031   | 0.039  | 0.988 $\pm$ 0.004 | 0.403 $\pm$ 0.075   | 0.039  |
|          | 10000     | 861861  | 0.975 $\pm$ 0.003 | 0.088 $\pm$ 0.034   | 0.037  | 0.989 $\pm$ 0.003 | 0.433 $\pm$ 0.077   | 0.037  |
| 0.20     | 100       | 7550    | 0.946 $\pm$ 0.011 | 0.158 $\pm$ 0.045   | 0.101  | 0.974 $\pm$ 0.010 | 0.496 $\pm$ 0.075   | 0.101  |
|          | 500       | 80449   | 0.971 $\pm$ 0.005 | 0.131 $\pm$ 0.045   | 0.042  | 0.988 $\pm$ 0.004 | 0.484 $\pm$ 0.078   | 0.042  |
|          | 1000      | 110875  | 0.972 $\pm$ 0.004 | 0.098 $\pm$ 0.038   | 0.037  | 0.989 $\pm$ 0.004 | 0.475 $\pm$ 0.079   | 0.037  |
|          | 5000      | 498016  | 0.977 $\pm$ 0.002 | 0.048 $\pm$ 0.010   | 0.039  | 0.985 $\pm$ 0.003 | 0.254 $\pm$ 0.066   | 0.039  |
|          | 10000     | 670130  | 0.977 $\pm$ 0.002 | 0.051 $\pm$ 0.019   | 0.037  | 0.984 $\pm$ 0.003 | 0.216 $\pm$ 0.060   | 0.037  |
| 0.50     | 100       | 7053    | 0.970 $\pm$ 0.005 | 0.156 $\pm$ 0.036   | 0.102  | 0.982 $\pm$ 0.005 | 0.395 $\pm$ 0.073   | 0.102  |
|          | 500       | 34712   | 0.977 $\pm$ 0.003 | 0.056 $\pm$ 0.009   | 0.042  | 0.984 $\pm$ 0.003 | 0.256 $\pm$ 0.065   | 0.042  |
|          | 1000      | 70925   | 0.979 $\pm$ 0.002 | 0.053 $\pm$ 0.014   | 0.036  | 0.985 $\pm$ 0.003 | 0.196 $\pm$ 0.052   | 0.036  |
|          | 5000      | 167019  | 0.978 $\pm$ 0.001 | 0.039 $\pm$ 0.002   | 0.039  | 0.979 $\pm$ 0.001 | 0.049 $\pm$ 0.014   | 0.039  |
|          | 10000     | 451373  | 0.979 $\pm$ 0.001 | 0.036 $\pm$ 0.001   | 0.037  | 0.979 $\pm$ 0.001 | 0.047 $\pm$ 0.016   | 0.037  |

**Open Category Detection with PAC Guarantees**

---

Table 2.  $n^*$ , recall (i.e. alien detection rate) and false positive rate from experiments using 9-dimensional normal data, 95%, iForest

| $\alpha$ | Basic CDF |         |                   |                     |        | Iso CDF           |                     |              |
|----------|-----------|---------|-------------------|---------------------|--------|-------------------|---------------------|--------------|
|          | $n$       | $n^*$   | Recall            | False Positive Rate |        | Recall            | False Positive Rate |              |
|          |           |         | Recall $\pm$ CI   | FPR $\pm$ CI        | Oracle |                   | Recall $\pm$ CI     | FPR $\pm$ CI |
| 0.01     | 100       | 275039  | 0.710 $\pm$ 0.033 | 0.033 $\pm$ 0.027   | 0.052  | 0.929 $\pm$ 0.029 | 0.509 $\pm$ 0.080   | 0.052        |
|          | 500       | 1474209 | 0.862 $\pm$ 0.019 | 0.033 $\pm$ 0.024   | 0.015  | 0.972 $\pm$ 0.016 | 0.533 $\pm$ 0.079   | 0.015        |
|          | 1000      | 2462157 | 0.884 $\pm$ 0.015 | 0.030 $\pm$ 0.024   | 0.012  | 0.978 $\pm$ 0.010 | 0.557 $\pm$ 0.081   | 0.012        |
|          | 5000      | 6171393 | 0.911 $\pm$ 0.010 | 0.039 $\pm$ 0.030   | 0.014  | 0.982 $\pm$ 0.008 | 0.496 $\pm$ 0.080   | 0.014        |
|          | 10000     | 9309633 | 0.918 $\pm$ 0.010 | 0.054 $\pm$ 0.032   | 0.014  | 0.981 $\pm$ 0.008 | 0.495 $\pm$ 0.081   | 0.014        |
| 0.05     | 100       | 27589   | 0.826 $\pm$ 0.027 | 0.082 $\pm$ 0.035   | 0.051  | 0.947 $\pm$ 0.022 | 0.489 $\pm$ 0.081   | 0.051        |
|          | 500       | 243154  | 0.920 $\pm$ 0.010 | 0.035 $\pm$ 0.020   | 0.015  | 0.975 $\pm$ 0.009 | 0.440 $\pm$ 0.079   | 0.015        |
|          | 1000      | 307512  | 0.923 $\pm$ 0.009 | 0.022 $\pm$ 0.011   | 0.012  | 0.966 $\pm$ 0.010 | 0.420 $\pm$ 0.084   | 0.012        |
|          | 5000      | 1356124 | 0.943 $\pm$ 0.005 | 0.040 $\pm$ 0.028   | 0.014  | 0.973 $\pm$ 0.007 | 0.351 $\pm$ 0.079   | 0.014        |
|          | 10000     | 1553411 | 0.945 $\pm$ 0.005 | 0.024 $\pm$ 0.009   | 0.014  | 0.972 $\pm$ 0.006 | 0.314 $\pm$ 0.074   | 0.014        |
| 0.10     | 100       | 28043   | 0.906 $\pm$ 0.016 | 0.101 $\pm$ 0.033   | 0.050  | 0.969 $\pm$ 0.013 | 0.511 $\pm$ 0.077   | 0.050        |
|          | 500       | 109029  | 0.933 $\pm$ 0.009 | 0.055 $\pm$ 0.032   | 0.015  | 0.974 $\pm$ 0.008 | 0.397 $\pm$ 0.078   | 0.015        |
|          | 1000      | 157112  | 0.934 $\pm$ 0.006 | 0.017 $\pm$ 0.006   | 0.012  | 0.969 $\pm$ 0.007 | 0.313 $\pm$ 0.075   | 0.012        |
|          | 5000      | 1232102 | 0.949 $\pm$ 0.004 | 0.027 $\pm$ 0.018   | 0.014  | 0.967 $\pm$ 0.006 | 0.194 $\pm$ 0.061   | 0.014        |
|          | 10000     | 861861  | 0.951 $\pm$ 0.003 | 0.027 $\pm$ 0.016   | 0.014  | 0.964 $\pm$ 0.005 | 0.192 $\pm$ 0.063   | 0.014        |
| 0.20     | 100       | 8666    | 0.929 $\pm$ 0.012 | 0.126 $\pm$ 0.042   | 0.051  | 0.963 $\pm$ 0.013 | 0.428 $\pm$ 0.073   | 0.051        |
|          | 500       | 121266  | 0.953 $\pm$ 0.006 | 0.054 $\pm$ 0.025   | 0.015  | 0.977 $\pm$ 0.006 | 0.360 $\pm$ 0.075   | 0.015        |
|          | 1000      | 177212  | 0.949 $\pm$ 0.004 | 0.018 $\pm$ 0.004   | 0.012  | 0.968 $\pm$ 0.006 | 0.273 $\pm$ 0.072   | 0.012        |
|          | 5000      | 581132  | 0.949 $\pm$ 0.002 | 0.014 $\pm$ 0.001   | 0.014  | 0.953 $\pm$ 0.003 | 0.039 $\pm$ 0.024   | 0.014        |
|          | 10000     | 776090  | 0.949 $\pm$ 0.002 | 0.014 $\pm$ 0.001   | 0.014  | 0.952 $\pm$ 0.003 | 0.042 $\pm$ 0.028   | 0.014        |
| 0.50     | 100       | 6349    | 0.952 $\pm$ 0.006 | 0.084 $\pm$ 0.021   | 0.052  | 0.966 $\pm$ 0.007 | 0.262 $\pm$ 0.061   | 0.052        |
|          | 500       | 56529   | 0.951 $\pm$ 0.003 | 0.018 $\pm$ 0.002   | 0.015  | 0.954 $\pm$ 0.004 | 0.038 $\pm$ 0.021   | 0.015        |
|          | 1000      | 111994  | 0.951 $\pm$ 0.002 | 0.013 $\pm$ 0.001   | 0.012  | 0.952 $\pm$ 0.002 | 0.014 $\pm$ 0.001   | 0.012        |
|          | 5000      | 292413  | 0.950 $\pm$ 0.001 | 0.014 $\pm$ 0.000   | 0.014  | 0.950 $\pm$ 0.001 | 0.014 $\pm$ 0.000   | 0.014        |
|          | 10000     | 379279  | 0.950 $\pm$ 0.001 | 0.014 $\pm$ 0.000   | 0.014  | 0.950 $\pm$ 0.001 | 0.014 $\pm$ 0.000   | 0.014        |

**Open Category Detection with PAC Guarantees**

Table 3.  $n^*$ , recall (i.e. alien detection rate) and false positive rate from experiments using 9-dimensional normal data, 90%, iForest

| $\alpha$ | $n$   | Basic CDF |                     |                   |        | Iso CDF             |                   |        |
|----------|-------|-----------|---------------------|-------------------|--------|---------------------|-------------------|--------|
|          |       | Recall    | False Positive Rate |                   | Recall | False Positive Rate |                   |        |
|          |       | $n^*$     | Recall $\pm$ CI     | FPR $\pm$ CI      | Oracle | Recall $\pm$ CI     | FPR $\pm$ CI      | Oracle |
| 0.01     | 100   | 331513    | 0.710 $\pm$ 0.033   | 0.033 $\pm$ 0.027 | 0.026  | 0.929 $\pm$ 0.029   | 0.509 $\pm$ 0.080 | 0.026  |
|          | 500   | 2340744   | 0.862 $\pm$ 0.019   | 0.033 $\pm$ 0.024 | 0.005  | 0.970 $\pm$ 0.016   | 0.517 $\pm$ 0.078 | 0.005  |
|          | 1000  | 3222506   | 0.859 $\pm$ 0.014   | 0.011 $\pm$ 0.008 | 0.004  | 0.976 $\pm$ 0.011   | 0.542 $\pm$ 0.081 | 0.004  |
|          | 5000  | 5918805   | 0.869 $\pm$ 0.011   | 0.012 $\pm$ 0.017 | 0.004  | 0.976 $\pm$ 0.01    | 0.476 $\pm$ 0.079 | 0.004  |
|          | 10000 | 12543171  | 0.884 $\pm$ 0.010   | 0.012 $\pm$ 0.009 | 0.005  | 0.971 $\pm$ 0.011   | 0.458 $\pm$ 0.080 | 0.005  |
| 0.05     | 100   | 37658     | 0.826 $\pm$ 0.027   | 0.081 $\pm$ 0.034 | 0.026  | 0.936 $\pm$ 0.024   | 0.468 $\pm$ 0.081 | 0.026  |
|          | 500   | 403920    | 0.893 $\pm$ 0.011   | 0.02 $\pm$ 0.015  | 0.006  | 0.960 $\pm$ 0.012   | 0.372 $\pm$ 0.075 | 0.006  |
|          | 1000  | 482922    | 0.888 $\pm$ 0.010   | 0.015 $\pm$ 0.011 | 0.004  | 0.945 $\pm$ 0.014   | 0.381 $\pm$ 0.082 | 0.004  |
|          | 5000  | 2307205   | 0.901 $\pm$ 0.006   | 0.007 $\pm$ 0.004 | 0.004  | 0.939 $\pm$ 0.011   | 0.228 $\pm$ 0.070 | 0.004  |
|          | 10000 | 2629242   | 0.898 $\pm$ 0.005   | 0.005 $\pm$ 0.001 | 0.005  | 0.923 $\pm$ 0.009   | 0.139 $\pm$ 0.056 | 0.005  |
| 0.10     | 100   | 39085     | 0.879 $\pm$ 0.017   | 0.059 $\pm$ 0.021 | 0.025  | 0.957 $\pm$ 0.016   | 0.463 $\pm$ 0.076 | 0.025  |
|          | 500   | 139647    | 0.900 $\pm$ 0.010   | 0.019 $\pm$ 0.014 | 0.005  | 0.944 $\pm$ 0.013   | 0.297 $\pm$ 0.073 | 0.005  |
|          | 1000  | 156669    | 0.888 $\pm$ 0.008   | 0.005 $\pm$ 0.001 | 0.004  | 0.925 $\pm$ 0.012   | 0.166 $\pm$ 0.058 | 0.004  |
|          | 5000  | 1867515   | 0.902 $\pm$ 0.003   | 0.004 $\pm$ 0.000 | 0.003  | 0.911 $\pm$ 0.006   | 0.060 $\pm$ 0.039 | 0.003  |
|          | 10000 | 1232102   | 0.900 $\pm$ 0.003   | 0.005 $\pm$ 0.000 | 0.005  | 0.903 $\pm$ 0.004   | 0.016 $\pm$ 0.015 | 0.005  |
| 0.20     | 100   | 6481      | 0.881 $\pm$ 0.017   | 0.060 $\pm$ 0.022 | 0.026  | 0.942 $\pm$ 0.016   | 0.359 $\pm$ 0.072 | 0.026  |
|          | 500   | 63235     | 0.909 $\pm$ 0.007   | 0.010 $\pm$ 0.003 | 0.005  | 0.937 $\pm$ 0.010   | 0.170 $\pm$ 0.057 | 0.005  |
|          | 1000  | 153077    | 0.902 $\pm$ 0.004   | 0.005 $\pm$ 0.000 | 0.004  | 0.913 $\pm$ 0.007   | 0.066 $\pm$ 0.040 | 0.004  |
|          | 5000  | 397467    | 0.898 $\pm$ 0.002   | 0.003 $\pm$ 0.000 | 0.004  | 0.898 $\pm$ 0.002   | 0.004 $\pm$ 0.000 | 0.004  |
|          | 10000 | 1088542   | 0.899 $\pm$ 0.002   | 0.005 $\pm$ 0.000 | 0.005  | 0.900 $\pm$ 0.002   | 0.005 $\pm$ 0.000 | 0.005  |
| 0.50     | 100   | 4400      | 0.912 $\pm$ 0.008   | 0.038 $\pm$ 0.005 | 0.026  | 0.920 $\pm$ 0.010   | 0.107 $\pm$ 0.042 | 0.026  |
|          | 500   | 22825     | 0.904 $\pm$ 0.004   | 0.006 $\pm$ 0.000 | 0.005  | 0.904 $\pm$ 0.004   | 0.006 $\pm$ 0.000 | 0.005  |
|          | 1000  | 44373     | 0.903 $\pm$ 0.003   | 0.004 $\pm$ 0.000 | 0.004  | 0.903 $\pm$ 0.003   | 0.004 $\pm$ 0.000 | 0.004  |
|          | 5000  | 229795    | 0.900 $\pm$ 0.001   | 0.004 $\pm$ 0.000 | 0.004  | 0.900 $\pm$ 0.001   | 0.004 $\pm$ 0.000 | 0.004  |
|          | 10000 | 374065    | 0.900 $\pm$ 0.001   | 0.005 $\pm$ 0.000 | 0.005  | 0.900 $\pm$ 0.001   | 0.005 $\pm$ 0.000 | 0.005  |

**Open Category Detection with PAC Guarantees**

---

Table 4.  $n^*$ , recall (i.e. alien detection rate) and false positive rate from experiments using 9-dimensional normal data, 98%, bootstrap LODA

| $\alpha$ | $n$   | Basic CDF |                   |                     |        | Iso CDF           |                     |        |
|----------|-------|-----------|-------------------|---------------------|--------|-------------------|---------------------|--------|
|          |       | Recall    |                   | False Positive Rate |        | Recall            | False Positive Rate |        |
|          |       | $n^*$     | Recall $\pm$ CI   | FPR $\pm$ CI        | Oracle | Recall $\pm$ CI   | FPR $\pm$ CI        | Oracle |
| 0.01     | 100   | 188760    | 0.719 $\pm$ 0.048 | 0.095 $\pm$ 0.039   | 0.135  | 0.972 $\pm$ 0.017 | 0.569 $\pm$ 0.073   | 0.135  |
|          | 500   | 1065490   | 0.872 $\pm$ 0.022 | 0.083 $\pm$ 0.038   | 0.048  | 0.974 $\pm$ 0.013 | 0.491 $\pm$ 0.079   | 0.048  |
|          | 1000  | 1891769   | 0.899 $\pm$ 0.016 | 0.060 $\pm$ 0.031   | 0.041  | 0.980 $\pm$ 0.009 | 0.511 $\pm$ 0.078   | 0.041  |
|          | 5000  | 5874989   | 0.942 $\pm$ 0.010 | 0.067 $\pm$ 0.030   | 0.034  | 0.988 $\pm$ 0.005 | 0.447 $\pm$ 0.078   | 0.034  |
|          | 10000 | 8907859   | 0.954 $\pm$ 0.008 | 0.069 $\pm$ 0.027   | 0.033  | 0.990 $\pm$ 0.005 | 0.444 $\pm$ 0.075   | 0.033  |
| 0.05     | 100   | 17905     | 0.842 $\pm$ 0.031 | 0.165 $\pm$ 0.051   | 0.132  | 0.942 $\pm$ 0.024 | 0.498 $\pm$ 0.077   | 0.132  |
|          | 500   | 177557    | 0.940 $\pm$ 0.011 | 0.118 $\pm$ 0.043   | 0.049  | 0.983 $\pm$ 0.007 | 0.430 $\pm$ 0.073   | 0.049  |
|          | 1000  | 340061    | 0.952 $\pm$ 0.008 | 0.090 $\pm$ 0.035   | 0.041  | 0.980 $\pm$ 0.007 | 0.462 $\pm$ 0.081   | 0.041  |
|          | 5000  | 2051058   | 0.971 $\pm$ 0.004 | 0.089 $\pm$ 0.034   | 0.034  | 0.988 $\pm$ 0.004 | 0.384 $\pm$ 0.076   | 0.034  |
|          | 10000 | 2362910   | 0.975 $\pm$ 0.004 | 0.079 $\pm$ 0.027   | 0.034  | 0.989 $\pm$ 0.003 | 0.360 $\pm$ 0.070   | 0.034  |
| 0.10     | 100   | 13692     | 0.933 $\pm$ 0.017 | 0.213 $\pm$ 0.046   | 0.142  | 0.977 $\pm$ 0.011 | 0.537 $\pm$ 0.070   | 0.142  |
|          | 500   | 79982     | 0.955 $\pm$ 0.008 | 0.097 $\pm$ 0.037   | 0.049  | 0.984 $\pm$ 0.006 | 0.456 $\pm$ 0.077   | 0.049  |
|          | 1000  | 191346    | 0.967 $\pm$ 0.005 | 0.070 $\pm$ 0.023   | 0.041  | 0.985 $\pm$ 0.005 | 0.402 $\pm$ 0.076   | 0.041  |
|          | 5000  | 1069912   | 0.977 $\pm$ 0.003 | 0.072 $\pm$ 0.028   | 0.034  | 0.989 $\pm$ 0.003 | 0.351 $\pm$ 0.070   | 0.034  |
|          | 10000 | 2042503   | 0.980 $\pm$ 0.003 | 0.087 $\pm$ 0.030   | 0.034  | 0.990 $\pm$ 0.003 | 0.342 $\pm$ 0.070   | 0.034  |
| 0.20     | 100   | 7818      | 0.949 $\pm$ 0.013 | 0.257 $\pm$ 0.057   | 0.131  | 0.970 $\pm$ 0.010 | 0.481 $\pm$ 0.076   | 0.131  |
|          | 500   | 54275     | 0.970 $\pm$ 0.005 | 0.125 $\pm$ 0.039   | 0.048  | 0.987 $\pm$ 0.004 | 0.451 $\pm$ 0.076   | 0.048  |
|          | 1000  | 121904    | 0.977 $\pm$ 0.004 | 0.102 $\pm$ 0.031   | 0.040  | 0.992 $\pm$ 0.003 | 0.462 $\pm$ 0.075   | 0.040  |
|          | 5000  | 612305    | 0.980 $\pm$ 0.002 | 0.059 $\pm$ 0.015   | 0.034  | 0.986 $\pm$ 0.003 | 0.217 $\pm$ 0.058   | 0.034  |
|          | 10000 | 922499    | 0.980 $\pm$ 0.002 | 0.073 $\pm$ 0.030   | 0.034  | 0.986 $\pm$ 0.002 | 0.215 $\pm$ 0.057   | 0.034  |
| 0.50     | 100   | 4604      | 0.973 $\pm$ 0.006 | 0.223 $\pm$ 0.042   | 0.135  | 0.983 $\pm$ 0.005 | 0.422 $\pm$ 0.067   | 0.135  |
|          | 500   | 25350     | 0.980 $\pm$ 0.003 | 0.093 $\pm$ 0.024   | 0.049  | 0.986 $\pm$ 0.003 | 0.258 $\pm$ 0.061   | 0.049  |
|          | 1000  | 101036    | 0.981 $\pm$ 0.002 | 0.065 $\pm$ 0.014   | 0.041  | 0.986 $\pm$ 0.002 | 0.177 $\pm$ 0.047   | 0.041  |
|          | 5000  | 431535    | 0.980 $\pm$ 0.001 | 0.037 $\pm$ 0.002   | 0.034  | 0.981 $\pm$ 0.001 | 0.047 $\pm$ 0.013   | 0.034  |
|          | 10000 | 615923    | 0.980 $\pm$ 0.001 | 0.034 $\pm$ 0.002   | 0.034  | 0.980 $\pm$ 0.001 | 0.038 $\pm$ 0.006   | 0.034  |

**Open Category Detection with PAC Guarantees**

---

Table 5.  $n^*$ , recall (i.e. alien detection rate) and false positive rate from experiments using 9-dimensional normal data, 95%, bootstrap LODA

| $\alpha$ | $n$   | $n^*$   | Basic CDF         |                   |                     | Iso CDF           |                   |                     |
|----------|-------|---------|-------------------|-------------------|---------------------|-------------------|-------------------|---------------------|
|          |       |         | Recall            |                   | False Positive Rate | Recall            |                   | False Positive Rate |
|          |       |         | Recall $\pm$ CI   | FPR $\pm$ CI      | Oracle              | Recall $\pm$ CI   | FPR $\pm$ CI      | Oracle              |
| 0.01     | 100   | 206671  | 0.719 $\pm$ 0.048 | 0.095 $\pm$ 0.039 | 0.077               | 0.972 $\pm$ 0.017 | 0.566 $\pm$ 0.073 | 0.077               |
|          | 500   | 1330996 | 0.872 $\pm$ 0.022 | 0.083 $\pm$ 0.038 | 0.020               | 0.974 $\pm$ 0.013 | 0.487 $\pm$ 0.078 | 0.020               |
|          | 1000  | 2559525 | 0.899 $\pm$ 0.016 | 0.060 $\pm$ 0.031 | 0.015               | 0.978 $\pm$ 0.010 | 0.505 $\pm$ 0.079 | 0.015               |
|          | 5000  | 7369343 | 0.933 $\pm$ 0.010 | 0.052 $\pm$ 0.023 | 0.011               | 0.985 $\pm$ 0.006 | 0.442 $\pm$ 0.078 | 0.011               |
|          | 10000 | 8307313 | 0.943 $\pm$ 0.009 | 0.059 $\pm$ 0.025 | 0.010               | 0.987 $\pm$ 0.006 | 0.413 $\pm$ 0.074 | 0.010               |
| 0.05     | 100   | 20685   | 0.841 $\pm$ 0.031 | 0.164 $\pm$ 0.050 | 0.076               | 0.939 $\pm$ 0.025 | 0.487 $\pm$ 0.075 | 0.076               |
|          | 500   | 175626  | 0.921 $\pm$ 0.013 | 0.092 $\pm$ 0.038 | 0.020               | 0.978 $\pm$ 0.009 | 0.392 $\pm$ 0.070 | 0.020               |
|          | 1000  | 463720  | 0.940 $\pm$ 0.009 | 0.057 $\pm$ 0.026 | 0.015               | 0.973 $\pm$ 0.009 | 0.410 $\pm$ 0.079 | 0.015               |
|          | 5000  | 3619299 | 0.952 $\pm$ 0.005 | 0.038 $\pm$ 0.022 | 0.011               | 0.978 $\pm$ 0.005 | 0.308 $\pm$ 0.072 | 0.011               |
|          | 10000 | 2934537 | 0.956 $\pm$ 0.004 | 0.024 $\pm$ 0.007 | 0.010               | 0.976 $\pm$ 0.005 | 0.246 $\pm$ 0.063 | 0.010               |
| 0.10     | 100   | 17884   | 0.929 $\pm$ 0.017 | 0.205 $\pm$ 0.046 | 0.083               | 0.976 $\pm$ 0.011 | 0.530 $\pm$ 0.070 | 0.083               |
|          | 500   | 85131   | 0.940 $\pm$ 0.009 | 0.083 $\pm$ 0.036 | 0.020               | 0.976 $\pm$ 0.008 | 0.376 $\pm$ 0.074 | 0.020               |
|          | 1000  | 142860  | 0.943 $\pm$ 0.007 | 0.039 $\pm$ 0.014 | 0.015               | 0.973 $\pm$ 0.008 | 0.304 $\pm$ 0.072 | 0.015               |
|          | 5000  | 1578820 | 0.955 $\pm$ 0.004 | 0.029 $\pm$ 0.018 | 0.011               | 0.971 $\pm$ 0.005 | 0.175 $\pm$ 0.057 | 0.011               |
|          | 10000 | 2255301 | 0.957 $\pm$ 0.003 | 0.022 $\pm$ 0.009 | 0.010               | 0.967 $\pm$ 0.005 | 0.146 $\pm$ 0.053 | 0.010               |
| 0.20     | 100   | 11831   | 0.940 $\pm$ 0.013 | 0.204 $\pm$ 0.049 | 0.075               | 0.964 $\pm$ 0.012 | 0.441 $\pm$ 0.073 | 0.075               |
|          | 500   | 65192   | 0.955 $\pm$ 0.007 | 0.077 $\pm$ 0.029 | 0.020               | 0.979 $\pm$ 0.006 | 0.352 $\pm$ 0.070 | 0.020               |
|          | 1000  | 174441  | 0.956 $\pm$ 0.005 | 0.041 $\pm$ 0.018 | 0.015               | 0.975 $\pm$ 0.006 | 0.271 $\pm$ 0.066 | 0.015               |
|          | 5000  | 802440  | 0.952 $\pm$ 0.002 | 0.013 $\pm$ 0.002 | 0.011               | 0.956 $\pm$ 0.003 | 0.041 $\pm$ 0.025 | 0.011               |
|          | 10000 | 2068150 | 0.952 $\pm$ 0.001 | 0.011 $\pm$ 0.001 | 0.010               | 0.954 $\pm$ 0.002 | 0.031 $\pm$ 0.023 | 0.010               |
| 0.50     | 100   | 5099    | 0.954 $\pm$ 0.007 | 0.123 $\pm$ 0.022 | 0.078               | 0.971 $\pm$ 0.007 | 0.325 $\pm$ 0.061 | 0.078               |
|          | 500   | 30120   | 0.953 $\pm$ 0.003 | 0.025 $\pm$ 0.003 | 0.020               | 0.956 $\pm$ 0.004 | 0.049 $\pm$ 0.022 | 0.020               |
|          | 1000  | 80278   | 0.952 $\pm$ 0.002 | 0.017 $\pm$ 0.001 | 0.015               | 0.952 $\pm$ 0.002 | 0.017 $\pm$ 0.001 | 0.015               |
|          | 5000  | 465368  | 0.951 $\pm$ 0.001 | 0.011 $\pm$ 0.000 | 0.011               | 0.951 $\pm$ 0.001 | 0.011 $\pm$ 0.000 | 0.011               |
|          | 10000 | 686935  | 0.950 $\pm$ 0.001 | 0.011 $\pm$ 0.000 | 0.010               | 0.950 $\pm$ 0.001 | 0.011 $\pm$ 0.000 | 0.010               |

**Open Category Detection with PAC Guarantees**

Table 6.  $n^*$ , recall (i.e. alien detection rate) and false positive rate from experiments using 9-dimensional normal data, 90%, bootstrap LODA

| $\alpha$ | Basic CDF |          |                   |                     |        | Iso CDF           |                     |        |
|----------|-----------|----------|-------------------|---------------------|--------|-------------------|---------------------|--------|
|          | $n$       | $n^*$    | Recall            | False Positive Rate |        | Recall            | False Positive Rate |        |
|          |           |          | Recall $\pm$ CI   | FPR $\pm$ CI        | Oracle | Recall $\pm$ CI   | FPR $\pm$ CI        | Oracle |
| 0.01     | 100       | 242739   | 0.719 $\pm$ 0.048 | 0.095 $\pm$ 0.039   | 0.045  | 0.972 $\pm$ 0.017 | 0.564 $\pm$ 0.073   | 0.045  |
|          | 500       | 2059638  | 0.872 $\pm$ 0.022 | 0.082 $\pm$ 0.038   | 0.008  | 0.969 $\pm$ 0.015 | 0.484 $\pm$ 0.079   | 0.008  |
|          | 1000      | 3398545  | 0.863 $\pm$ 0.017 | 0.033 $\pm$ 0.020   | 0.006  | 0.973 $\pm$ 0.012 | 0.487 $\pm$ 0.079   | 0.006  |
|          | 5000      | 9739214  | 0.900 $\pm$ 0.013 | 0.032 $\pm$ 0.019   | 0.003  | 0.981 $\pm$ 0.007 | 0.411 $\pm$ 0.076   | 0.003  |
|          | 10000     | 11575949 | 0.911 $\pm$ 0.012 | 0.030 $\pm$ 0.016   | 0.003  | 0.980 $\pm$ 0.009 | 0.359 $\pm$ 0.072   | 0.003  |
| 0.05     | 100       | 27002    | 0.841 $\pm$ 0.031 | 0.157 $\pm$ 0.048   | 0.044  | 0.936 $\pm$ 0.026 | 0.460 $\pm$ 0.074   | 0.044  |
|          | 500       | 255234   | 0.892 $\pm$ 0.014 | 0.058 $\pm$ 0.033   | 0.008  | 0.964 $\pm$ 0.013 | 0.359 $\pm$ 0.070   | 0.008  |
|          | 1000      | 426176   | 0.900 $\pm$ 0.011 | 0.018 $\pm$ 0.009   | 0.006  | 0.957 $\pm$ 0.012 | 0.365 $\pm$ 0.077   | 0.006  |
|          | 5000      | 2440377  | 0.914 $\pm$ 0.006 | 0.010 $\pm$ 0.005   | 0.003  | 0.945 $\pm$ 0.009 | 0.188 $\pm$ 0.063   | 0.003  |
|          | 10000     | 4972658  | 0.907 $\pm$ 0.005 | 0.004 $\pm$ 0.001   | 0.003  | 0.933 $\pm$ 0.009 | 0.130 $\pm$ 0.052   | 0.003  |
| 0.10     | 100       | 18177    | 0.898 $\pm$ 0.020 | 0.152 $\pm$ 0.040   | 0.049  | 0.969 $\pm$ 0.013 | 0.487 $\pm$ 0.070   | 0.049  |
|          | 500       | 123537   | 0.910 $\pm$ 0.011 | 0.049 $\pm$ 0.027   | 0.008  | 0.954 $\pm$ 0.012 | 0.303 $\pm$ 0.069   | 0.008  |
|          | 1000      | 140581   | 0.897 $\pm$ 0.009 | 0.013 $\pm$ 0.006   | 0.006  | 0.936 $\pm$ 0.012 | 0.175 $\pm$ 0.057   | 0.006  |
|          | 5000      | 2329443  | 0.906 $\pm$ 0.003 | 0.004 $\pm$ 0.000   | 0.003  | 0.915 $\pm$ 0.006 | 0.053 $\pm$ 0.033   | 0.003  |
|          | 10000     | 2968332  | 0.905 $\pm$ 0.003 | 0.003 $\pm$ 0.000   | 0.003  | 0.908 $\pm$ 0.004 | 0.014 $\pm$ 0.016   | 0.003  |
| 0.20     | 100       | 9199     | 0.915 $\pm$ 0.016 | 0.149 $\pm$ 0.043   | 0.043  | 0.953 $\pm$ 0.014 | 0.393 $\pm$ 0.071   | 0.043  |
|          | 500       | 59467    | 0.914 $\pm$ 0.008 | 0.021 $\pm$ 0.014   | 0.008  | 0.942 $\pm$ 0.010 | 0.189 $\pm$ 0.059   | 0.008  |
|          | 1000      | 178906   | 0.911 $\pm$ 0.005 | 0.008 $\pm$ 0.001   | 0.006  | 0.923 $\pm$ 0.008 | 0.078 $\pm$ 0.039   | 0.006  |
|          | 5000      | 786472   | 0.901 $\pm$ 0.002 | 0.004 $\pm$ 0.000   | 0.003  | 0.901 $\pm$ 0.002 | 0.004 $\pm$ 0.000   | 0.003  |
|          | 10000     | 1349754  | 0.901 $\pm$ 0.001 | 0.003 $\pm$ 0.000   | 0.003  | 0.901 $\pm$ 0.001 | 0.003 $\pm$ 0.000   | 0.003  |
| 0.50     | 100       | 13581    | 0.921 $\pm$ 0.008 | 0.067 $\pm$ 0.010   | 0.045  | 0.934 $\pm$ 0.009 | 0.148 $\pm$ 0.042   | 0.045  |
|          | 500       | 13945    | 0.902 $\pm$ 0.004 | 0.009 $\pm$ 0.001   | 0.008  | 0.902 $\pm$ 0.004 | 0.009 $\pm$ 0.001   | 0.008  |
|          | 1000      | 96151    | 0.904 $\pm$ 0.003 | 0.006 $\pm$ 0.000   | 0.006  | 0.904 $\pm$ 0.003 | 0.006 $\pm$ 0.000   | 0.006  |
|          | 5000      | 227331   | 0.900 $\pm$ 0.001 | 0.003 $\pm$ 0.000   | 0.003  | 0.900 $\pm$ 0.001 | 0.003 $\pm$ 0.000   | 0.003  |
|          | 10000     | 537171   | 0.901 $\pm$ 0.001 | 0.003 $\pm$ 0.000   | 0.003  | 0.901 $\pm$ 0.001 | 0.003 $\pm$ 0.000   | 0.003  |

Table 7. 1st quartile, median, 3rd quartile of false positive rate from experiments using 9-dimensional normal data, 95%, Iforest

| Basic CDF<br>False Positive Rate |       |              |        |              |                |
|----------------------------------|-------|--------------|--------|--------------|----------------|
| $\alpha$                         | $n$   | 1st quartile | median | 3rd quartile | Oracle(median) |
| 0.01                             | 100   | 0.004        | 0.006  | 0.014        | 0.051          |
|                                  | 500   | 0.002        | 0.004  | 0.015        | 0.015          |
|                                  | 1000  | 0.002        | 0.004  | 0.010        | 0.012          |
|                                  | 5000  | 0.002        | 0.004  | 0.013        | 0.014          |
|                                  | 10000 | 0.003        | 0.006  | 0.014        | 0.014          |
| 0.05                             | 100   | 0.006        | 0.014  | 0.043        | 0.050          |
|                                  | 500   | 0.004        | 0.008  | 0.023        | 0.015          |
|                                  | 1000  | 0.004        | 0.008  | 0.015        | 0.012          |
|                                  | 5000  | 0.006        | 0.010  | 0.020        | 0.014          |
|                                  | 10000 | 0.008        | 0.011  | 0.019        | 0.014          |
| 0.1                              | 100   | 0.015        | 0.032  | 0.094        | 0.049          |
|                                  | 500   | 0.006        | 0.012  | 0.021        | 0.015          |
|                                  | 1000  | 0.005        | 0.009  | 0.014        | 0.012          |
|                                  | 5000  | 0.009        | 0.013  | 0.020        | 0.014          |
|                                  | 10000 | 0.011        | 0.014  | 0.017        | 0.014          |
| 0.2                              | 100   | 0.025        | 0.043  | 0.105        | 0.049          |
|                                  | 500   | 0.010        | 0.018  | 0.031        | 0.015          |
|                                  | 1000  | 0.008        | 0.011  | 0.018        | 0.012          |
|                                  | 5000  | 0.010        | 0.013  | 0.015        | 0.014          |
|                                  | 10000 | 0.012        | 0.013  | 0.015        | 0.014          |
| 0.5                              | 100   | 0.040        | 0.058  | 0.090        | 0.051          |
|                                  | 500   | 0.012        | 0.016  | 0.021        | 0.015          |
|                                  | 1000  | 0.011        | 0.012  | 0.016        | 0.012          |
|                                  | 5000  | 0.013        | 0.014  | 0.016        | 0.014          |
|                                  | 10000 | 0.013        | 0.014  | 0.015        | 0.014          |



**Open Category Detection with PAC Guarantees**

Table 8. Recall (i.e. alien detection rate) & False Positive Rate for Image Datasets,98%

| Dataset                   | $\alpha$ $\hat{\alpha}$ |       | Basic CDF         |                     | Iso CDF           |                     |
|---------------------------|-------------------------|-------|-------------------|---------------------|-------------------|---------------------|
|                           |                         |       | Recall            | False Positive Rate | Recall            | False Positive Rate |
|                           |                         |       | recall $\pm$ CI   | FPR $\pm$ CI        | recall $\pm$ CI   | FPR $\pm$ CI        |
| Tiny Image Net<br>n=10000 | 0.100                   | 0.100 | 0.926 $\pm$ 0.014 | 0.677 $\pm$ 0.030   | 0.944 $\pm$ 0.013 | 0.746 $\pm$ 0.034   |
|                           | 0.100                   | 0.104 | 0.933 $\pm$ 0.013 | 0.695 $\pm$ 0.030   | 0.952 $\pm$ 0.012 | 0.766 $\pm$ 0.033   |
|                           | 0.100                   | 0.108 | 0.941 $\pm$ 0.012 | 0.715 $\pm$ 0.029   | 0.959 $\pm$ 0.011 | 0.786 $\pm$ 0.031   |
|                           | 0.200                   | 0.200 | 0.965 $\pm$ 0.005 | 0.738 $\pm$ 0.018   | 0.972 $\pm$ 0.005 | 0.774 $\pm$ 0.021   |
|                           | 0.200                   | 0.204 | 0.970 $\pm$ 0.004 | 0.761 $\pm$ 0.018   | 0.977 $\pm$ 0.004 | 0.798 $\pm$ 0.019   |
|                           | 0.200                   | 0.208 | 0.977 $\pm$ 0.004 | 0.787 $\pm$ 0.017   | 0.983 $\pm$ 0.003 | 0.825 $\pm$ 0.018   |
|                           | 0.400                   | 0.400 | 0.976 $\pm$ 0.003 | 0.766 $\pm$ 0.011   | 0.978 $\pm$ 0.003 | 0.776 $\pm$ 0.012   |
|                           | 0.400                   | 0.404 | 0.982 $\pm$ 0.002 | 0.793 $\pm$ 0.011   | 0.983 $\pm$ 0.002 | 0.802 $\pm$ 0.011   |
|                           | 0.400                   | 0.408 | 0.987 $\pm$ 0.002 | 0.822 $\pm$ 0.010   | 0.988 $\pm$ 0.002 | 0.833 $\pm$ 0.010   |
| MNIST<br>n=11154          | 0.100                   | 0.100 | 0.981 $\pm$ 0.006 | 0.466 $\pm$ 0.041   | 0.987 $\pm$ 0.006 | 0.569 $\pm$ 0.061   |
|                           | 0.100                   | 0.104 | 0.987 $\pm$ 0.005 | 0.518 $\pm$ 0.044   | 0.991 $\pm$ 0.005 | 0.628 $\pm$ 0.061   |
|                           | 0.100                   | 0.108 | 0.991 $\pm$ 0.004 | 0.573 $\pm$ 0.049   | 0.994 $\pm$ 0.003 | 0.691 $\pm$ 0.060   |
|                           | 0.200                   | 0.200 | 0.983 $\pm$ 0.004 | 0.444 $\pm$ 0.030   | 0.986 $\pm$ 0.004 | 0.483 $\pm$ 0.041   |
|                           | 0.200                   | 0.204 | 0.990 $\pm$ 0.003 | 0.511 $\pm$ 0.037   | 0.992 $\pm$ 0.003 | 0.567 $\pm$ 0.045   |
|                           | 0.200                   | 0.208 | 0.997 $\pm$ 0.001 | 0.610 $\pm$ 0.038   | 0.998 $\pm$ 0.001 | 0.684 $\pm$ 0.040   |
|                           | 0.400                   | 0.400 | 0.983 $\pm$ 0.003 | 0.416 $\pm$ 0.014   | 0.983 $\pm$ 0.003 | 0.421 $\pm$ 0.015   |
|                           | 0.400                   | 0.404 | 0.993 $\pm$ 0.002 | 0.504 $\pm$ 0.024   | 0.993 $\pm$ 0.002 | 0.519 $\pm$ 0.028   |
|                           | 0.400                   | 0.408 | 0.999 $\pm$ 0.001 | 0.655 $\pm$ 0.030   | 0.999 $\pm$ 0.001 | 0.683 $\pm$ 0.032   |

Table 9. Recall (i.e. alien detection rate) & False Positive Rate for Image Datasets,95%

| Dataset                   | $\alpha$ $\hat{\alpha}$ |       | Basic CDF         |                     | Iso CDF           |                     |
|---------------------------|-------------------------|-------|-------------------|---------------------|-------------------|---------------------|
|                           |                         |       | Recall            | False Positive Rate | Recall            | False Positive Rate |
|                           |                         |       | recall $\pm$ CI   | FPR $\pm$ CI        | recall $\pm$ CI   | FPR $\pm$ CI        |
| Tiny Image Net<br>n=10000 | 0.100                   | 0.100 | 0.902 $\pm$ 0.014 | 0.620 $\pm$ 0.025   | 0.924 $\pm$ 0.014 | 0.686 $\pm$ 0.032   |
|                           | 0.100                   | 0.104 | 0.912 $\pm$ 0.014 | 0.639 $\pm$ 0.026   | 0.930 $\pm$ 0.014 | 0.697 $\pm$ 0.031   |
|                           | 0.100                   | 0.108 | 0.923 $\pm$ 0.013 | 0.660 $\pm$ 0.026   | 0.939 $\pm$ 0.012 | 0.716 $\pm$ 0.031   |
|                           | 0.200                   | 0.200 | 0.942 $\pm$ 0.006 | 0.667 $\pm$ 0.016   | 0.948 $\pm$ 0.006 | 0.682 $\pm$ 0.016   |
|                           | 0.200                   | 0.204 | 0.949 $\pm$ 0.005 | 0.683 $\pm$ 0.014   | 0.954 $\pm$ 0.005 | 0.700 $\pm$ 0.015   |
|                           | 0.200                   | 0.208 | 0.957 $\pm$ 0.005 | 0.706 $\pm$ 0.014   | 0.962 $\pm$ 0.005 | 0.722 $\pm$ 0.015   |
|                           | 0.400                   | 0.400 | 0.948 $\pm$ 0.003 | 0.669 $\pm$ 0.007   | 0.949 $\pm$ 0.003 | 0.672 $\pm$ 0.007   |
|                           | 0.400                   | 0.404 | 0.956 $\pm$ 0.003 | 0.689 $\pm$ 0.007   | 0.957 $\pm$ 0.003 | 0.692 $\pm$ 0.007   |
|                           | 0.400                   | 0.408 | 0.964 $\pm$ 0.002 | 0.714 $\pm$ 0.007   | 0.965 $\pm$ 0.002 | 0.718 $\pm$ 0.007   |
| MNIST<br>n=11154          | 0.100                   | 0.100 | 0.971 $\pm$ 0.007 | 0.404 $\pm$ 0.032   | 0.975 $\pm$ 0.007 | 0.448 $\pm$ 0.042   |
|                           | 0.100                   | 0.104 | 0.977 $\pm$ 0.006 | 0.432 $\pm$ 0.033   | 0.982 $\pm$ 0.006 | 0.488 $\pm$ 0.045   |
|                           | 0.100                   | 0.108 | 0.984 $\pm$ 0.005 | 0.477 $\pm$ 0.036   | 0.988 $\pm$ 0.005 | 0.542 $\pm$ 0.048   |
|                           | 0.200                   | 0.200 | 0.966 $\pm$ 0.005 | 0.361 $\pm$ 0.017   | 0.967 $\pm$ 0.005 | 0.368 $\pm$ 0.018   |
|                           | 0.200                   | 0.204 | 0.976 $\pm$ 0.004 | 0.397 $\pm$ 0.018   | 0.977 $\pm$ 0.004 | 0.410 $\pm$ 0.022   |
|                           | 0.200                   | 0.208 | 0.986 $\pm$ 0.003 | 0.455 $\pm$ 0.023   | 0.988 $\pm$ 0.003 | 0.477 $\pm$ 0.028   |
|                           | 0.400                   | 0.400 | 0.957 $\pm$ 0.003 | 0.334 $\pm$ 0.005   | 0.957 $\pm$ 0.003 | 0.334 $\pm$ 0.005   |
|                           | 0.400                   | 0.404 | 0.972 $\pm$ 0.003 | 0.373 $\pm$ 0.007   | 0.973 $\pm$ 0.003 | 0.375 $\pm$ 0.007   |
|                           | 0.400                   | 0.408 | 0.987 $\pm$ 0.002 | 0.441 $\pm$ 0.012   | 0.988 $\pm$ 0.002 | 0.444 $\pm$ 0.012   |

Table 10. Recall (i.e. alien detection rate) & False Positive Rate for Image Datasets,90%

| Dataset                   |          |                | Basic CDF         |                     | Iso CDF           |                     |
|---------------------------|----------|----------------|-------------------|---------------------|-------------------|---------------------|
|                           | $\alpha$ | $\hat{\alpha}$ | Recall            | False Positive Rate | Recall            | False Positive Rate |
|                           |          |                | recall $\pm$ CI   | FPR $\pm$ CI        | recall $\pm$ CI   | FPR $\pm$ CI        |
| Tiny Image Net<br>n=10000 | 0.100    | 0.100          | 0.862 $\pm$ 0.015 | 0.545 $\pm$ 0.021   | 0.883 $\pm$ 0.016 | 0.590 $\pm$ 0.027   |
|                           | 0.100    | 0.104          | 0.873 $\pm$ 0.015 | 0.562 $\pm$ 0.021   | 0.892 $\pm$ 0.015 | 0.602 $\pm$ 0.026   |
|                           | 0.100    | 0.108          | 0.885 $\pm$ 0.014 | 0.579 $\pm$ 0.021   | 0.902 $\pm$ 0.014 | 0.617 $\pm$ 0.025   |
|                           | 0.200    | 0.200          | 0.894 $\pm$ 0.007 | 0.578 $\pm$ 0.011   | 0.898 $\pm$ 0.007 | 0.584 $\pm$ 0.011   |
|                           | 0.200    | 0.204          | 0.904 $\pm$ 0.007 | 0.593 $\pm$ 0.010   | 0.909 $\pm$ 0.006 | 0.600 $\pm$ 0.011   |
|                           | 0.200    | 0.208          | 0.915 $\pm$ 0.006 | 0.609 $\pm$ 0.010   | 0.919 $\pm$ 0.006 | 0.617 $\pm$ 0.011   |
|                           | 0.400    | 0.400          | 0.898 $\pm$ 0.003 | 0.577 $\pm$ 0.004   | 0.899 $\pm$ 0.003 | 0.578 $\pm$ 0.004   |
|                           | 0.400    | 0.404          | 0.907 $\pm$ 0.003 | 0.590 $\pm$ 0.004   | 0.908 $\pm$ 0.003 | 0.591 $\pm$ 0.004   |
|                           | 0.400    | 0.408          | 0.919 $\pm$ 0.003 | 0.608 $\pm$ 0.004   | 0.920 $\pm$ 0.003 | 0.609 $\pm$ 0.004   |
| MNIST<br>n=11154          | 0.100    | 0.100          | 0.949 $\pm$ 0.008 | 0.328 $\pm$ 0.020   | 0.954 $\pm$ 0.008 | 0.342 $\pm$ 0.024   |
|                           | 0.100    | 0.104          | 0.958 $\pm$ 0.007 | 0.352 $\pm$ 0.022   | 0.962 $\pm$ 0.007 | 0.366 $\pm$ 0.025   |
|                           | 0.100    | 0.108          | 0.967 $\pm$ 0.007 | 0.378 $\pm$ 0.024   | 0.971 $\pm$ 0.007 | 0.395 $\pm$ 0.027   |
|                           | 0.200    | 0.200          | 0.928 $\pm$ 0.005 | 0.282 $\pm$ 0.006   | 0.929 $\pm$ 0.005 | 0.285 $\pm$ 0.007   |
|                           | 0.200    | 0.204          | 0.942 $\pm$ 0.004 | 0.306 $\pm$ 0.007   | 0.944 $\pm$ 0.004 | 0.309 $\pm$ 0.008   |
|                           | 0.200    | 0.208          | 0.958 $\pm$ 0.004 | 0.341 $\pm$ 0.010   | 0.960 $\pm$ 0.004 | 0.345 $\pm$ 0.011   |
|                           | 0.400    | 0.400          | 0.912 $\pm$ 0.003 | 0.260 $\pm$ 0.003   | 0.912 $\pm$ 0.003 | 0.260 $\pm$ 0.003   |
|                           | 0.400    | 0.404          | 0.929 $\pm$ 0.003 | 0.284 $\pm$ 0.003   | 0.930 $\pm$ 0.003 | 0.284 $\pm$ 0.003   |
|                           | 0.400    | 0.408          | 0.949 $\pm$ 0.003 | 0.317 $\pm$ 0.004   | 0.949 $\pm$ 0.003 | 0.317 $\pm$ 0.004   |

Open Category Detection with PAC Guarantees

Table 11. Recall & False Positive Rate for Landsat Dataset using LODA for varying  $q$  (target recall  $1 - q$ )

| Dataset           |          |                |       | Basic CDF         |                     | Iso CDF           |                     |
|-------------------|----------|----------------|-------|-------------------|---------------------|-------------------|---------------------|
|                   | $\alpha$ | $\hat{\alpha}$ | $q$   | Recall            | False Positive Rate | Recall            | False Positive Rate |
|                   |          |                |       | recall $\pm$ CI   | FPR $\pm$ CI        | recall $\pm$ CI   | FPR $\pm$ CI        |
| Landsat<br>n=1532 | 0.100    | 0.100          | 0.020 | 0.937 $\pm$ 0.024 | 0.162 $\pm$ 0.047   | 0.960 $\pm$ 0.024 | 0.495 $\pm$ 0.068   |
|                   | 0.100    | 0.104          | 0.020 | 0.949 $\pm$ 0.024 | 0.203 $\pm$ 0.048   | 0.967 $\pm$ 0.024 | 0.543 $\pm$ 0.064   |
|                   | 0.100    | 0.108          | 0.020 | 0.960 $\pm$ 0.024 | 0.255 $\pm$ 0.050   | 0.972 $\pm$ 0.024 | 0.583 $\pm$ 0.062   |
|                   | 0.200    | 0.200          | 0.020 | 0.965 $\pm$ 0.005 | 0.128 $\pm$ 0.033   | 0.983 $\pm$ 0.005 | 0.404 $\pm$ 0.062   |
|                   | 0.200    | 0.204          | 0.020 | 0.980 $\pm$ 0.003 | 0.204 $\pm$ 0.040   | 0.991 $\pm$ 0.003 | 0.478 $\pm$ 0.061   |
|                   | 0.200    | 0.208          | 0.020 | 0.989 $\pm$ 0.002 | 0.301 $\pm$ 0.047   | 0.996 $\pm$ 0.001 | 0.557 $\pm$ 0.057   |
|                   | 0.400    | 0.400          | 0.020 | 0.971 $\pm$ 0.013 | 0.114 $\pm$ 0.021   | 0.981 $\pm$ 0.013 | 0.323 $\pm$ 0.055   |
|                   | 0.400    | 0.404          | 0.020 | 0.985 $\pm$ 0.012 | 0.267 $\pm$ 0.033   | 0.989 $\pm$ 0.012 | 0.491 $\pm$ 0.051   |
|                   | 0.400    | 0.408          | 0.020 | 0.991 $\pm$ 0.012 | 0.480 $\pm$ 0.039   | 0.993 $\pm$ 0.012 | 0.658 $\pm$ 0.041   |
|                   | 0.100    | 0.100          | 0.050 | 0.924 $\pm$ 0.024 | 0.127 $\pm$ 0.041   | 0.952 $\pm$ 0.025 | 0.430 $\pm$ 0.067   |
|                   | 0.100    | 0.104          | 0.050 | 0.936 $\pm$ 0.024 | 0.157 $\pm$ 0.044   | 0.959 $\pm$ 0.024 | 0.463 $\pm$ 0.065   |
|                   | 0.100    | 0.108          | 0.050 | 0.950 $\pm$ 0.024 | 0.202 $\pm$ 0.047   | 0.966 $\pm$ 0.024 | 0.506 $\pm$ 0.064   |
|                   | 0.200    | 0.200          | 0.050 | 0.942 $\pm$ 0.006 | 0.069 $\pm$ 0.020   | 0.964 $\pm$ 0.006 | 0.271 $\pm$ 0.057   |
|                   | 0.200    | 0.204          | 0.050 | 0.964 $\pm$ 0.004 | 0.112 $\pm$ 0.027   | 0.980 $\pm$ 0.004 | 0.337 $\pm$ 0.056   |
|                   | 0.200    | 0.208          | 0.050 | 0.981 $\pm$ 0.003 | 0.201 $\pm$ 0.039   | 0.991 $\pm$ 0.002 | 0.425 $\pm$ 0.055   |
|                   | 0.400    | 0.400          | 0.050 | 0.948 $\pm$ 0.013 | 0.046 $\pm$ 0.008   | 0.952 $\pm$ 0.013 | 0.094 $\pm$ 0.028   |
|                   | 0.400    | 0.404          | 0.050 | 0.969 $\pm$ 0.012 | 0.095 $\pm$ 0.015   | 0.976 $\pm$ 0.012 | 0.209 $\pm$ 0.038   |
|                   | 0.400    | 0.408          | 0.050 | 0.986 $\pm$ 0.012 | 0.250 $\pm$ 0.029   | 0.989 $\pm$ 0.012 | 0.385 $\pm$ 0.041   |
|                   | 0.100    | 0.100          | 0.100 | 0.888 $\pm$ 0.025 | 0.089 $\pm$ 0.036   | 0.924 $\pm$ 0.025 | 0.323 $\pm$ 0.064   |
|                   | 0.100    | 0.104          | 0.100 | 0.906 $\pm$ 0.024 | 0.106 $\pm$ 0.038   | 0.938 $\pm$ 0.025 | 0.345 $\pm$ 0.064   |
|                   | 0.100    | 0.108          | 0.100 | 0.927 $\pm$ 0.024 | 0.136 $\pm$ 0.041   | 0.953 $\pm$ 0.025 | 0.380 $\pm$ 0.063   |
|                   | 0.200    | 0.200          | 0.100 | 0.902 $\pm$ 0.007 | 0.034 $\pm$ 0.008   | 0.918 $\pm$ 0.009 | 0.115 $\pm$ 0.037   |
|                   | 0.200    | 0.204          | 0.100 | 0.928 $\pm$ 0.005 | 0.047 $\pm$ 0.012   | 0.941 $\pm$ 0.007 | 0.151 $\pm$ 0.040   |
|                   | 0.200    | 0.208          | 0.100 | 0.953 $\pm$ 0.005 | 0.076 $\pm$ 0.018   | 0.966 $\pm$ 0.005 | 0.216 $\pm$ 0.044   |
|                   | 0.400    | 0.400          | 0.100 | 0.899 $\pm$ 0.012 | 0.029 $\pm$ 0.008   | 0.899 $\pm$ 0.012 | 0.030 $\pm$ 0.008   |
|                   | 0.400    | 0.404          | 0.100 | 0.927 $\pm$ 0.012 | 0.035 $\pm$ 0.008   | 0.927 $\pm$ 0.012 | 0.036 $\pm$ 0.008   |
|                   | 0.400    | 0.408          | 0.100 | 0.957 $\pm$ 0.012 | 0.055 $\pm$ 0.008   | 0.960 $\pm$ 0.012 | 0.076 $\pm$ 0.015   |

**Open Category Detection with PAC Guarantees**

Table 12. Recall & False Positive Rate for page.blocks Dataset using LODA for varying  $q$  (target recall  $1 - q$ )

| Dataset              |          |                |       | Basic CDF         |                     | Iso CDF           |                     |
|----------------------|----------|----------------|-------|-------------------|---------------------|-------------------|---------------------|
|                      | $\alpha$ | $\hat{\alpha}$ | $q$   | Recall            | False Positive Rate | Recall            | False Positive Rate |
|                      |          |                |       | recall $\pm$ CI   | FPR $\pm$ CI        | recall $\pm$ CI   | FPR $\pm$ CI        |
| pageblocks<br>n=4912 | 0.100    | 0.100          | 0.020 | 0.963 $\pm$ 0.021 | 0.254 $\pm$ 0.084   | 0.983 $\pm$ 0.013 | 0.555 $\pm$ 0.201   |
|                      | 0.100    | 0.104          | 0.020 | 0.969 $\pm$ 0.017 | 0.315 $\pm$ 0.138   | 0.991 $\pm$ 0.006 | 0.624 $\pm$ 0.181   |
|                      | 0.100    | 0.108          | 0.020 | 0.976 $\pm$ 0.013 | 0.357 $\pm$ 0.137   | 0.995 $\pm$ 0.004 | 0.712 $\pm$ 0.159   |
|                      | 0.200    | 0.200          | 0.020 | 0.966 $\pm$ 0.005 | 0.287 $\pm$ 0.031   | 0.978 $\pm$ 0.005 | 0.452 $\pm$ 0.053   |
|                      | 0.200    | 0.204          | 0.020 | 0.978 $\pm$ 0.004 | 0.367 $\pm$ 0.038   | 0.987 $\pm$ 0.003 | 0.529 $\pm$ 0.050   |
|                      | 0.200    | 0.208          | 0.020 | 0.989 $\pm$ 0.003 | 0.468 $\pm$ 0.041   | 0.994 $\pm$ 0.002 | 0.626 $\pm$ 0.045   |
|                      | 0.400    | 0.400          | 0.020 | 0.971 $\pm$ 0.004 | 0.261 $\pm$ 0.028   | 0.980 $\pm$ 0.004 | 0.411 $\pm$ 0.048   |
|                      | 0.400    | 0.404          | 0.020 | 0.986 $\pm$ 0.002 | 0.384 $\pm$ 0.035   | 0.991 $\pm$ 0.002 | 0.532 $\pm$ 0.047   |
|                      | 0.400    | 0.408          | 0.020 | 0.994 $\pm$ 0.001 | 0.531 $\pm$ 0.038   | 0.996 $\pm$ 0.001 | 0.655 $\pm$ 0.043   |
|                      | 0.100    | 0.100          | 0.050 | 0.945 $\pm$ 0.031 | 0.218 $\pm$ 0.070   | 0.964 $\pm$ 0.029 | 0.419 $\pm$ 0.210   |
|                      | 0.100    | 0.104          | 0.050 | 0.958 $\pm$ 0.024 | 0.259 $\pm$ 0.100   | 0.975 $\pm$ 0.018 | 0.458 $\pm$ 0.201   |
|                      | 0.100    | 0.108          | 0.050 | 0.967 $\pm$ 0.018 | 0.304 $\pm$ 0.117   | 0.985 $\pm$ 0.012 | 0.551 $\pm$ 0.185   |
|                      | 0.200    | 0.200          | 0.050 | 0.945 $\pm$ 0.007 | 0.204 $\pm$ 0.019   | 0.955 $\pm$ 0.007 | 0.291 $\pm$ 0.040   |
|                      | 0.200    | 0.204          | 0.050 | 0.963 $\pm$ 0.005 | 0.258 $\pm$ 0.025   | 0.972 $\pm$ 0.005 | 0.362 $\pm$ 0.042   |
|                      | 0.200    | 0.208          | 0.050 | 0.978 $\pm$ 0.004 | 0.338 $\pm$ 0.031   | 0.985 $\pm$ 0.004 | 0.448 $\pm$ 0.043   |
|                      | 0.400    | 0.400          | 0.050 | 0.945 $\pm$ 0.004 | 0.173 $\pm$ 0.012   | 0.950 $\pm$ 0.005 | 0.217 $\pm$ 0.029   |
|                      | 0.400    | 0.404          | 0.050 | 0.966 $\pm$ 0.003 | 0.228 $\pm$ 0.020   | 0.972 $\pm$ 0.004 | 0.303 $\pm$ 0.034   |
|                      | 0.400    | 0.408          | 0.050 | 0.985 $\pm$ 0.002 | 0.339 $\pm$ 0.027   | 0.989 $\pm$ 0.002 | 0.423 $\pm$ 0.036   |
|                      | 0.100    | 0.100          | 0.100 | 0.908 $\pm$ 0.027 | 0.153 $\pm$ 0.030   | 0.939 $\pm$ 0.027 | 0.245 $\pm$ 0.105   |
|                      | 0.100    | 0.104          | 0.100 | 0.928 $\pm$ 0.021 | 0.187 $\pm$ 0.049   | 0.943 $\pm$ 0.024 | 0.253 $\pm$ 0.102   |
|                      | 0.100    | 0.108          | 0.100 | 0.947 $\pm$ 0.022 | 0.222 $\pm$ 0.071   | 0.959 $\pm$ 0.023 | 0.305 $\pm$ 0.119   |
|                      | 0.200    | 0.200          | 0.100 | 0.899 $\pm$ 0.007 | 0.139 $\pm$ 0.007   | 0.905 $\pm$ 0.008 | 0.162 $\pm$ 0.017   |
|                      | 0.200    | 0.204          | 0.100 | 0.922 $\pm$ 0.007 | 0.161 $\pm$ 0.010   | 0.929 $\pm$ 0.007 | 0.190 $\pm$ 0.020   |
|                      | 0.200    | 0.208          | 0.100 | 0.946 $\pm$ 0.006 | 0.201 $\pm$ 0.016   | 0.954 $\pm$ 0.006 | 0.243 $\pm$ 0.026   |
|                      | 0.400    | 0.400          | 0.100 | 0.901 $\pm$ 0.005 | 0.125 $\pm$ 0.004   | 0.903 $\pm$ 0.005 | 0.127 $\pm$ 0.005   |
|                      | 0.400    | 0.404          | 0.100 | 0.922 $\pm$ 0.004 | 0.143 $\pm$ 0.005   | 0.924 $\pm$ 0.004 | 0.148 $\pm$ 0.008   |
|                      | 0.400    | 0.408          | 0.100 | 0.948 $\pm$ 0.004 | 0.174 $\pm$ 0.008   | 0.951 $\pm$ 0.004 | 0.190 $\pm$ 0.013   |

**Open Category Detection with PAC Guarantees**

Table 13. Recall & False Positive Rate for Optical.digits Dataset using LODA for varying  $q$  (target recall  $1 - q$ )

| Dataset                 |          |                |       | Basic CDF         |                     | Iso CDF           |                     |
|-------------------------|----------|----------------|-------|-------------------|---------------------|-------------------|---------------------|
|                         | $\alpha$ | $\hat{\alpha}$ | $q$   | Recall            | False Positive Rate | Recall            | False Positive Rate |
|                         |          |                |       | recall $\pm$ CI   | FPR $\pm$ CI        | recall $\pm$ CI   | FPR $\pm$ CI        |
| Optical.digits<br>n=568 | 0.100    | 0.100          | 0.020 | 0.898 $\pm$ 0.016 | 0.167 $\pm$ 0.035   | 0.947 $\pm$ 0.016 | 0.502 $\pm$ 0.070   |
|                         | 0.100    | 0.104          | 0.020 | 0.906 $\pm$ 0.013 | 0.186 $\pm$ 0.036   | 0.950 $\pm$ 0.013 | 0.519 $\pm$ 0.066   |
|                         | 0.100    | 0.108          | 0.020 | 0.917 $\pm$ 0.013 | 0.214 $\pm$ 0.036   | 0.957 $\pm$ 0.012 | 0.549 $\pm$ 0.065   |
|                         | 0.200    | 0.200          | 0.020 | 0.938 $\pm$ 0.011 | 0.177 $\pm$ 0.033   | 0.964 $\pm$ 0.010 | 0.434 $\pm$ 0.065   |
|                         | 0.200    | 0.204          | 0.020 | 0.953 $\pm$ 0.008 | 0.220 $\pm$ 0.039   | 0.973 $\pm$ 0.008 | 0.466 $\pm$ 0.063   |
|                         | 0.200    | 0.208          | 0.020 | 0.968 $\pm$ 0.007 | 0.270 $\pm$ 0.041   | 0.983 $\pm$ 0.006 | 0.511 $\pm$ 0.061   |
|                         | 0.400    | 0.400          | 0.020 | 0.966 $\pm$ 0.006 | 0.254 $\pm$ 0.041   | 0.978 $\pm$ 0.006 | 0.441 $\pm$ 0.061   |
|                         | 0.400    | 0.404          | 0.020 | 0.979 $\pm$ 0.004 | 0.339 $\pm$ 0.045   | 0.986 $\pm$ 0.004 | 0.517 $\pm$ 0.058   |
|                         | 0.400    | 0.408          | 0.020 | 0.989 $\pm$ 0.003 | 0.439 $\pm$ 0.048   | 0.994 $\pm$ 0.002 | 0.606 $\pm$ 0.053   |
|                         | 0.100    | 0.100          | 0.050 | 0.887 $\pm$ 0.016 | 0.146 $\pm$ 0.033   | 0.948 $\pm$ 0.015 | 0.459 $\pm$ 0.068   |
|                         | 0.100    | 0.104          | 0.050 | 0.892 $\pm$ 0.014 | 0.166 $\pm$ 0.033   | 0.944 $\pm$ 0.014 | 0.481 $\pm$ 0.066   |
|                         | 0.100    | 0.108          | 0.050 | 0.906 $\pm$ 0.013 | 0.188 $\pm$ 0.034   | 0.952 $\pm$ 0.013 | 0.504 $\pm$ 0.065   |
|                         | 0.200    | 0.200          | 0.050 | 0.924 $\pm$ 0.011 | 0.135 $\pm$ 0.025   | 0.954 $\pm$ 0.010 | 0.342 $\pm$ 0.059   |
|                         | 0.200    | 0.204          | 0.050 | 0.936 $\pm$ 0.009 | 0.165 $\pm$ 0.029   | 0.963 $\pm$ 0.009 | 0.381 $\pm$ 0.059   |
|                         | 0.200    | 0.208          | 0.050 | 0.955 $\pm$ 0.008 | 0.212 $\pm$ 0.034   | 0.974 $\pm$ 0.007 | 0.432 $\pm$ 0.060   |
|                         | 0.400    | 0.400          | 0.050 | 0.946 $\pm$ 0.006 | 0.149 $\pm$ 0.024   | 0.959 $\pm$ 0.007 | 0.290 $\pm$ 0.049   |
|                         | 0.400    | 0.404          | 0.050 | 0.964 $\pm$ 0.005 | 0.219 $\pm$ 0.031   | 0.974 $\pm$ 0.006 | 0.356 $\pm$ 0.049   |
|                         | 0.400    | 0.408          | 0.050 | 0.980 $\pm$ 0.004 | 0.319 $\pm$ 0.040   | 0.986 $\pm$ 0.004 | 0.443 $\pm$ 0.049   |
|                         | 0.100    | 0.100          | 0.100 | 0.840 $\pm$ 0.021 | 0.119 $\pm$ 0.029   | 0.910 $\pm$ 0.021 | 0.403 $\pm$ 0.067   |
|                         | 0.100    | 0.104          | 0.100 | 0.866 $\pm$ 0.015 | 0.132 $\pm$ 0.031   | 0.928 $\pm$ 0.016 | 0.413 $\pm$ 0.065   |
|                         | 0.100    | 0.108          | 0.100 | 0.879 $\pm$ 0.014 | 0.151 $\pm$ 0.032   | 0.937 $\pm$ 0.015 | 0.430 $\pm$ 0.065   |
|                         | 0.200    | 0.200          | 0.100 | 0.883 $\pm$ 0.013 | 0.080 $\pm$ 0.012   | 0.916 $\pm$ 0.015 | 0.237 $\pm$ 0.050   |
|                         | 0.200    | 0.204          | 0.100 | 0.905 $\pm$ 0.010 | 0.104 $\pm$ 0.018   | 0.936 $\pm$ 0.011 | 0.264 $\pm$ 0.050   |
|                         | 0.200    | 0.208          | 0.100 | 0.926 $\pm$ 0.010 | 0.138 $\pm$ 0.024   | 0.953 $\pm$ 0.010 | 0.300 $\pm$ 0.050   |
|                         | 0.400    | 0.400          | 0.100 | 0.904 $\pm$ 0.007 | 0.072 $\pm$ 0.006   | 0.916 $\pm$ 0.009 | 0.129 $\pm$ 0.026   |
|                         | 0.400    | 0.404          | 0.100 | 0.925 $\pm$ 0.006 | 0.096 $\pm$ 0.009   | 0.936 $\pm$ 0.008 | 0.168 $\pm$ 0.031   |
|                         | 0.400    | 0.408          | 0.100 | 0.951 $\pm$ 0.006 | 0.150 $\pm$ 0.019   | 0.960 $\pm$ 0.006 | 0.233 $\pm$ 0.036   |

**Open Category Detection with PAC Guarantees**

---

Table 14. Recall & False Positive Rate for Letter Recognition Dataset using LODA for varying  $q$  (target recall  $1 - q$ )

| Dataset                     |          |                |       | Basic CDF         |                     | Iso CDF           |                     |
|-----------------------------|----------|----------------|-------|-------------------|---------------------|-------------------|---------------------|
|                             | $\alpha$ | $\hat{\alpha}$ | $q$   | Recall            | False Positive Rate | Recall            | False Positive Rate |
|                             |          |                |       | recall $\pm$ CI   | FPR $\pm$ CI        | recall $\pm$ CI   | FPR $\pm$ CI        |
| Letter recognition<br>n=788 | 0.100    | 0.100          | 0.020 | 0.897 $\pm$ 0.018 | 0.232 $\pm$ 0.044   | 0.953 $\pm$ 0.016 | 0.596 $\pm$ 0.069   |
|                             | 0.100    | 0.104          | 0.020 | 0.918 $\pm$ 0.013 | 0.255 $\pm$ 0.045   | 0.967 $\pm$ 0.010 | 0.613 $\pm$ 0.067   |
|                             | 0.100    | 0.108          | 0.020 | 0.931 $\pm$ 0.012 | 0.291 $\pm$ 0.047   | 0.975 $\pm$ 0.008 | 0.633 $\pm$ 0.065   |
|                             | 0.200    | 0.200          | 0.020 | 0.940 $\pm$ 0.011 | 0.197 $\pm$ 0.032   | 0.964 $\pm$ 0.011 | 0.457 $\pm$ 0.066   |
|                             | 0.200    | 0.204          | 0.020 | 0.954 $\pm$ 0.008 | 0.235 $\pm$ 0.035   | 0.974 $\pm$ 0.007 | 0.490 $\pm$ 0.063   |
|                             | 0.200    | 0.208          | 0.020 | 0.969 $\pm$ 0.006 | 0.281 $\pm$ 0.039   | 0.983 $\pm$ 0.006 | 0.537 $\pm$ 0.061   |
|                             | 0.400    | 0.400          | 0.020 | 0.968 $\pm$ 0.006 | 0.242 $\pm$ 0.029   | 0.977 $\pm$ 0.006 | 0.430 $\pm$ 0.056   |
|                             | 0.400    | 0.404          | 0.020 | 0.983 $\pm$ 0.004 | 0.335 $\pm$ 0.038   | 0.989 $\pm$ 0.003 | 0.525 $\pm$ 0.055   |
|                             | 0.400    | 0.408          | 0.020 | 0.993 $\pm$ 0.003 | 0.448 $\pm$ 0.044   | 0.996 $\pm$ 0.002 | 0.639 $\pm$ 0.049   |
|                             | 0.100    | 0.100          | 0.050 | 0.885 $\pm$ 0.020 | 0.205 $\pm$ 0.042   | 0.949 $\pm$ 0.015 | 0.550 $\pm$ 0.069   |
|                             | 0.100    | 0.104          | 0.050 | 0.904 $\pm$ 0.015 | 0.223 $\pm$ 0.041   | 0.958 $\pm$ 0.012 | 0.570 $\pm$ 0.066   |
|                             | 0.100    | 0.108          | 0.050 | 0.919 $\pm$ 0.013 | 0.252 $\pm$ 0.043   | 0.965 $\pm$ 0.010 | 0.587 $\pm$ 0.065   |
|                             | 0.200    | 0.200          | 0.050 | 0.912 $\pm$ 0.013 | 0.156 $\pm$ 0.024   | 0.944 $\pm$ 0.013 | 0.375 $\pm$ 0.060   |
|                             | 0.200    | 0.204          | 0.050 | 0.934 $\pm$ 0.010 | 0.188 $\pm$ 0.027   | 0.960 $\pm$ 0.009 | 0.407 $\pm$ 0.059   |
|                             | 0.200    | 0.208          | 0.050 | 0.954 $\pm$ 0.008 | 0.229 $\pm$ 0.034   | 0.973 $\pm$ 0.008 | 0.455 $\pm$ 0.059   |
|                             | 0.400    | 0.400          | 0.050 | 0.946 $\pm$ 0.006 | 0.147 $\pm$ 0.012   | 0.956 $\pm$ 0.007 | 0.245 $\pm$ 0.039   |
|                             | 0.400    | 0.404          | 0.050 | 0.967 $\pm$ 0.005 | 0.208 $\pm$ 0.020   | 0.974 $\pm$ 0.005 | 0.334 $\pm$ 0.043   |
|                             | 0.400    | 0.408          | 0.050 | 0.984 $\pm$ 0.004 | 0.306 $\pm$ 0.032   | 0.988 $\pm$ 0.004 | 0.432 $\pm$ 0.046   |
|                             | 0.100    | 0.100          | 0.100 | 0.857 $\pm$ 0.020 | 0.152 $\pm$ 0.031   | 0.929 $\pm$ 0.018 | 0.473 $\pm$ 0.067   |
|                             | 0.100    | 0.104          | 0.100 | 0.875 $\pm$ 0.017 | 0.172 $\pm$ 0.033   | 0.939 $\pm$ 0.016 | 0.490 $\pm$ 0.066   |
|                             | 0.100    | 0.108          | 0.100 | 0.892 $\pm$ 0.016 | 0.197 $\pm$ 0.036   | 0.949 $\pm$ 0.014 | 0.519 $\pm$ 0.066   |
|                             | 0.200    | 0.200          | 0.100 | 0.875 $\pm$ 0.014 | 0.111 $\pm$ 0.016   | 0.905 $\pm$ 0.015 | 0.236 $\pm$ 0.045   |
|                             | 0.200    | 0.204          | 0.100 | 0.900 $\pm$ 0.011 | 0.132 $\pm$ 0.018   | 0.928 $\pm$ 0.012 | 0.280 $\pm$ 0.048   |
|                             | 0.200    | 0.208          | 0.100 | 0.923 $\pm$ 0.010 | 0.158 $\pm$ 0.022   | 0.950 $\pm$ 0.010 | 0.326 $\pm$ 0.051   |
|                             | 0.400    | 0.400          | 0.100 | 0.901 $\pm$ 0.007 | 0.099 $\pm$ 0.004   | 0.906 $\pm$ 0.008 | 0.110 $\pm$ 0.008   |
|                             | 0.400    | 0.404          | 0.100 | 0.925 $\pm$ 0.006 | 0.117 $\pm$ 0.005   | 0.932 $\pm$ 0.006 | 0.145 $\pm$ 0.015   |
|                             | 0.400    | 0.408          | 0.100 | 0.953 $\pm$ 0.005 | 0.155 $\pm$ 0.010   | 0.959 $\pm$ 0.006 | 0.203 $\pm$ 0.023   |

**Open Category Detection with PAC Guarantees**

---

Table 15. Recall & False Positive Rate for Shuttle Dataset using LODA for varying  $q$  (target recall  $1 - q$ )

| Dataset           |          |                |       | Basic CDF         |                     | Iso CDF           |                     |
|-------------------|----------|----------------|-------|-------------------|---------------------|-------------------|---------------------|
|                   | $\alpha$ | $\hat{\alpha}$ | $q$   | Recall            | False Positive Rate | Recall            | False Positive Rate |
|                   |          |                |       | recall $\pm$ CI   | FPR $\pm$ CI        | recall $\pm$ CI   | FPR $\pm$ CI        |
| Shuttle<br>n=5000 | 0.100    | 0.100          | 0.020 | 0.959 $\pm$ 0.008 | 0.145 $\pm$ 0.031   | 0.973 $\pm$ 0.007 | 0.425 $\pm$ 0.065   |
|                   | 0.100    | 0.104          | 0.020 | 0.971 $\pm$ 0.006 | 0.205 $\pm$ 0.038   | 0.984 $\pm$ 0.006 | 0.490 $\pm$ 0.065   |
|                   | 0.100    | 0.108          | 0.020 | 0.984 $\pm$ 0.005 | 0.287 $\pm$ 0.048   | 0.991 $\pm$ 0.003 | 0.550 $\pm$ 0.064   |
|                   | 0.200    | 0.200          | 0.020 | 0.975 $\pm$ 0.004 | 0.100 $\pm$ 0.016   | 0.982 $\pm$ 0.004 | 0.317 $\pm$ 0.058   |
|                   | 0.200    | 0.204          | 0.020 | 0.990 $\pm$ 0.002 | 0.195 $\pm$ 0.033   | 0.994 $\pm$ 0.002 | 0.451 $\pm$ 0.058   |
|                   | 0.200    | 0.208          | 0.020 | 0.998 $\pm$ 0.001 | 0.355 $\pm$ 0.042   | 0.999 $\pm$ 0.001 | 0.578 $\pm$ 0.052   |
|                   | 0.400    | 0.400          | 0.020 | 0.980 $\pm$ 0.002 | 0.090 $\pm$ 0.014   | 0.982 $\pm$ 0.002 | 0.154 $\pm$ 0.031   |
|                   | 0.400    | 0.404          | 0.020 | 0.996 $\pm$ 0.001 | 0.238 $\pm$ 0.028   | 0.997 $\pm$ 0.001 | 0.396 $\pm$ 0.042   |
|                   | 0.400    | 0.408          | 0.020 | 1.000 $\pm$ 0.000 | 0.540 $\pm$ 0.032   | 1.000 $\pm$ 0.000 | 0.642 $\pm$ 0.034   |
|                   | 0.100    | 0.100          | 0.050 | 0.937 $\pm$ 0.009 | 0.095 $\pm$ 0.017   | 0.957 $\pm$ 0.009 | 0.326 $\pm$ 0.059   |
|                   | 0.100    | 0.104          | 0.050 | 0.958 $\pm$ 0.007 | 0.137 $\pm$ 0.027   | 0.972 $\pm$ 0.007 | 0.370 $\pm$ 0.059   |
|                   | 0.100    | 0.108          | 0.050 | 0.974 $\pm$ 0.006 | 0.200 $\pm$ 0.036   | 0.983 $\pm$ 0.005 | 0.435 $\pm$ 0.059   |
|                   | 0.200    | 0.200          | 0.050 | 0.949 $\pm$ 0.005 | 0.064 $\pm$ 0.004   | 0.956 $\pm$ 0.006 | 0.142 $\pm$ 0.034   |
|                   | 0.200    | 0.204          | 0.050 | 0.973 $\pm$ 0.004 | 0.093 $\pm$ 0.011   | 0.979 $\pm$ 0.004 | 0.224 $\pm$ 0.043   |
|                   | 0.200    | 0.208          | 0.050 | 0.992 $\pm$ 0.002 | 0.186 $\pm$ 0.028   | 0.995 $\pm$ 0.002 | 0.365 $\pm$ 0.045   |
|                   | 0.400    | 0.400          | 0.050 | 0.949 $\pm$ 0.002 | 0.061 $\pm$ 0.001   | 0.949 $\pm$ 0.002 | 0.061 $\pm$ 0.001   |
|                   | 0.400    | 0.404          | 0.050 | 0.976 $\pm$ 0.002 | 0.082 $\pm$ 0.006   | 0.977 $\pm$ 0.002 | 0.104 $\pm$ 0.016   |
|                   | 0.400    | 0.408          | 0.050 | 0.997 $\pm$ 0.001 | 0.220 $\pm$ 0.022   | 0.998 $\pm$ 0.001 | 0.290 $\pm$ 0.028   |
|                   | 0.100    | 0.100          | 0.100 | 0.901 $\pm$ 0.012 | 0.056 $\pm$ 0.006   | 0.917 $\pm$ 0.013 | 0.187 $\pm$ 0.047   |
|                   | 0.100    | 0.104          | 0.100 | 0.923 $\pm$ 0.010 | 0.072 $\pm$ 0.010   | 0.939 $\pm$ 0.011 | 0.216 $\pm$ 0.047   |
|                   | 0.100    | 0.108          | 0.100 | 0.947 $\pm$ 0.008 | 0.105 $\pm$ 0.019   | 0.960 $\pm$ 0.009 | 0.266 $\pm$ 0.049   |
|                   | 0.200    | 0.200          | 0.100 | 0.903 $\pm$ 0.004 | 0.047 $\pm$ 0.001   | 0.905 $\pm$ 0.004 | 0.048 $\pm$ 0.002   |
|                   | 0.200    | 0.204          | 0.100 | 0.928 $\pm$ 0.004 | 0.054 $\pm$ 0.002   | 0.931 $\pm$ 0.005 | 0.064 $\pm$ 0.008   |
|                   | 0.200    | 0.208          | 0.100 | 0.958 $\pm$ 0.004 | 0.068 $\pm$ 0.004   | 0.963 $\pm$ 0.004 | 0.111 $\pm$ 0.020   |
|                   | 0.400    | 0.400          | 0.100 | 0.899 $\pm$ 0.002 | 0.047 $\pm$ 0.001   | 0.899 $\pm$ 0.002 | 0.047 $\pm$ 0.001   |
|                   | 0.400    | 0.404          | 0.100 | 0.925 $\pm$ 0.002 | 0.054 $\pm$ 0.001   | 0.925 $\pm$ 0.002 | 0.054 $\pm$ 0.001   |
|                   | 0.400    | 0.408          | 0.100 | 0.959 $\pm$ 0.002 | 0.065 $\pm$ 0.001   | 0.959 $\pm$ 0.002 | 0.066 $\pm$ 0.001   |

**Open Category Detection with PAC Guarantees**

---

Table 16. Recall & False Positive Rate for Coverttype Dataset using LODA for varying  $q$  (target recall  $1 - q$ )

| Dataset               | $\alpha$ $\hat{\alpha}$ $q$ |       |       | Basic CDF         |                     | Iso CDF           |                     |
|-----------------------|-----------------------------|-------|-------|-------------------|---------------------|-------------------|---------------------|
|                       |                             |       |       | Recall            | False Positive Rate | Recall            | False Positive Rate |
|                       |                             |       |       | recall $\pm$ CI   | FPR $\pm$ CI        | recall $\pm$ CI   | FPR $\pm$ CI        |
| Coverttype<br>n=13624 | 0.100                       | 0.100 | 0.020 | 0.979 $\pm$ 0.002 | 0.010 $\pm$ 0.003   | 0.989 $\pm$ 0.002 | 0.373 $\pm$ 0.072   |
|                       | 0.100                       | 0.104 | 0.020 | 0.995 $\pm$ 0.001 | 0.098 $\pm$ 0.025   | 0.998 $\pm$ 0.001 | 0.470 $\pm$ 0.066   |
|                       | 0.100                       | 0.108 | 0.020 | 0.999 $\pm$ 0.000 | 0.292 $\pm$ 0.045   | 0.999 $\pm$ 0.000 | 0.586 $\pm$ 0.059   |
|                       | 0.200                       | 0.200 | 0.020 | 0.980 $\pm$ 0.001 | 0.007 $\pm$ 0.002   | 0.987 $\pm$ 0.002 | 0.220 $\pm$ 0.056   |
|                       | 0.200                       | 0.204 | 0.020 | 0.998 $\pm$ 0.000 | 0.142 $\pm$ 0.026   | 0.999 $\pm$ 0.000 | 0.419 $\pm$ 0.057   |
|                       | 0.200                       | 0.208 | 0.020 | 1.000 $\pm$ 0.000 | 0.423 $\pm$ 0.044   | 1.000 $\pm$ 0.000 | 0.618 $\pm$ 0.047   |
|                       | 0.400                       | 0.400 | 0.020 | 0.981 $\pm$ 0.001 | 0.009 $\pm$ 0.001   | 0.984 $\pm$ 0.002 | 0.134 $\pm$ 0.044   |
|                       | 0.400                       | 0.404 | 0.020 | 0.998 $\pm$ 0.000 | 0.212 $\pm$ 0.029   | 0.999 $\pm$ 0.000 | 0.438 $\pm$ 0.050   |
|                       | 0.400                       | 0.408 | 0.020 | 1.000 $\pm$ 0.000 | 0.560 $\pm$ 0.037   | 1.000 $\pm$ 0.000 | 0.676 $\pm$ 0.036   |
|                       | 0.100                       | 0.100 | 0.050 | 0.951 $\pm$ 0.002 | 0.002 $\pm$ 0.000   | 0.963 $\pm$ 0.004 | 0.164 $\pm$ 0.051   |
|                       | 0.100                       | 0.104 | 0.050 | 0.978 $\pm$ 0.001 | 0.012 $\pm$ 0.004   | 0.987 $\pm$ 0.002 | 0.277 $\pm$ 0.059   |
|                       | 0.100                       | 0.108 | 0.050 | 0.997 $\pm$ 0.001 | 0.112 $\pm$ 0.026   | 0.998 $\pm$ 0.000 | 0.411 $\pm$ 0.060   |
|                       | 0.200                       | 0.200 | 0.050 | 0.951 $\pm$ 0.001 | 0.003 $\pm$ 0.000   | 0.952 $\pm$ 0.002 | 0.017 $\pm$ 0.016   |
|                       | 0.200                       | 0.204 | 0.050 | 0.979 $\pm$ 0.001 | 0.008 $\pm$ 0.002   | 0.983 $\pm$ 0.001 | 0.114 $\pm$ 0.035   |
|                       | 0.200                       | 0.208 | 0.050 | 0.999 $\pm$ 0.000 | 0.153 $\pm$ 0.025   | 1.000 $\pm$ 0.000 | 0.319 $\pm$ 0.045   |
|                       | 0.400                       | 0.400 | 0.050 | 0.952 $\pm$ 0.001 | 0.006 $\pm$ 0.000   | 0.952 $\pm$ 0.001 | 0.006 $\pm$ 0.000   |
|                       | 0.400                       | 0.404 | 0.050 | 0.980 $\pm$ 0.001 | 0.012 $\pm$ 0.002   | 0.981 $\pm$ 0.001 | 0.050 $\pm$ 0.015   |
|                       | 0.400                       | 0.408 | 0.050 | 0.999 $\pm$ 0.000 | 0.199 $\pm$ 0.023   | 1.000 $\pm$ 0.000 | 0.307 $\pm$ 0.034   |
|                       | 0.100                       | 0.100 | 0.100 | 0.900 $\pm$ 0.003 | 0.002 $\pm$ 0.000   | 0.904 $\pm$ 0.004 | 0.025 $\pm$ 0.019   |
|                       | 0.100                       | 0.104 | 0.100 | 0.930 $\pm$ 0.001 | 0.002 $\pm$ 0.000   | 0.937 $\pm$ 0.004 | 0.055 $\pm$ 0.029   |
|                       | 0.100                       | 0.108 | 0.100 | 0.965 $\pm$ 0.001 | 0.004 $\pm$ 0.001   | 0.973 $\pm$ 0.003 | 0.121 $\pm$ 0.038   |
|                       | 0.200                       | 0.200 | 0.100 | 0.901 $\pm$ 0.002 | 0.002 $\pm$ 0.000   | 0.901 $\pm$ 0.002 | 0.002 $\pm$ 0.000   |
|                       | 0.200                       | 0.204 | 0.100 | 0.929 $\pm$ 0.001 | 0.002 $\pm$ 0.000   | 0.929 $\pm$ 0.001 | 0.002 $\pm$ 0.000   |
|                       | 0.200                       | 0.208 | 0.100 | 0.965 $\pm$ 0.001 | 0.004 $\pm$ 0.000   | 0.965 $\pm$ 0.001 | 0.011 $\pm$ 0.004   |
|                       | 0.400                       | 0.400 | 0.100 | 0.901 $\pm$ 0.002 | 0.005 $\pm$ 0.000   | 0.901 $\pm$ 0.002 | 0.005 $\pm$ 0.000   |
|                       | 0.400                       | 0.404 | 0.100 | 0.929 $\pm$ 0.001 | 0.005 $\pm$ 0.000   | 0.929 $\pm$ 0.001 | 0.005 $\pm$ 0.000   |
|                       | 0.400                       | 0.408 | 0.100 | 0.965 $\pm$ 0.001 | 0.007 $\pm$ 0.000   | 0.965 $\pm$ 0.001 | 0.008 $\pm$ 0.001   |



**Open Category Detection with PAC Guarantees**

Table 17. Recall & False Positive Rate for Landsat Dataset using Iforest for varying  $q$  (target recall  $1 - q$ )

| Dataset           |          |                |       | Basic CDF         |                     | Iso CDF           |                     |
|-------------------|----------|----------------|-------|-------------------|---------------------|-------------------|---------------------|
|                   | $\alpha$ | $\hat{\alpha}$ | $q$   | Recall            | False Positive Rate | Recall            | False Positive Rate |
|                   |          |                |       | recall $\pm$ CI   | FPR $\pm$ CI        | recall $\pm$ CI   | FPR $\pm$ CI        |
| Landsat<br>n=1532 | 0.100    | 0.100          | 0.020 | 0.941 $\pm$ 0.024 | 0.164 $\pm$ 0.045   | 0.964 $\pm$ 0.025 | 0.503 $\pm$ 0.066   |
|                   | 0.100    | 0.104          | 0.020 | 0.950 $\pm$ 0.024 | 0.197 $\pm$ 0.048   | 0.968 $\pm$ 0.024 | 0.545 $\pm$ 0.065   |
|                   | 0.100    | 0.108          | 0.020 | 0.960 $\pm$ 0.024 | 0.254 $\pm$ 0.051   | 0.971 $\pm$ 0.024 | 0.584 $\pm$ 0.063   |
|                   | 0.200    | 0.200          | 0.020 | 0.965 $\pm$ 0.005 | 0.130 $\pm$ 0.033   | 0.982 $\pm$ 0.004 | 0.402 $\pm$ 0.063   |
|                   | 0.200    | 0.204          | 0.020 | 0.979 $\pm$ 0.003 | 0.199 $\pm$ 0.040   | 0.991 $\pm$ 0.003 | 0.477 $\pm$ 0.060   |
|                   | 0.200    | 0.208          | 0.020 | 0.989 $\pm$ 0.002 | 0.304 $\pm$ 0.048   | 0.996 $\pm$ 0.002 | 0.556 $\pm$ 0.057   |
|                   | 0.400    | 0.400          | 0.020 | 0.970 $\pm$ 0.012 | 0.109 $\pm$ 0.018   | 0.979 $\pm$ 0.012 | 0.323 $\pm$ 0.054   |
|                   | 0.400    | 0.404          | 0.020 | 0.985 $\pm$ 0.012 | 0.266 $\pm$ 0.034   | 0.989 $\pm$ 0.012 | 0.488 $\pm$ 0.051   |
|                   | 0.400    | 0.408          | 0.020 | 0.991 $\pm$ 0.012 | 0.477 $\pm$ 0.039   | 0.993 $\pm$ 0.012 | 0.655 $\pm$ 0.042   |
|                   | 0.100    | 0.100          | 0.050 | 0.923 $\pm$ 0.024 | 0.130 $\pm$ 0.042   | 0.950 $\pm$ 0.025 | 0.423 $\pm$ 0.069   |
|                   | 0.100    | 0.104          | 0.050 | 0.936 $\pm$ 0.024 | 0.161 $\pm$ 0.045   | 0.959 $\pm$ 0.025 | 0.467 $\pm$ 0.066   |
|                   | 0.100    | 0.108          | 0.050 | 0.951 $\pm$ 0.024 | 0.204 $\pm$ 0.047   | 0.967 $\pm$ 0.024 | 0.509 $\pm$ 0.064   |
|                   | 0.200    | 0.200          | 0.050 | 0.945 $\pm$ 0.006 | 0.074 $\pm$ 0.022   | 0.965 $\pm$ 0.006 | 0.265 $\pm$ 0.056   |
|                   | 0.200    | 0.204          | 0.050 | 0.964 $\pm$ 0.004 | 0.117 $\pm$ 0.029   | 0.979 $\pm$ 0.004 | 0.332 $\pm$ 0.055   |
|                   | 0.200    | 0.208          | 0.050 | 0.980 $\pm$ 0.003 | 0.198 $\pm$ 0.037   | 0.991 $\pm$ 0.003 | 0.425 $\pm$ 0.054   |
|                   | 0.400    | 0.400          | 0.050 | 0.949 $\pm$ 0.012 | 0.044 $\pm$ 0.007   | 0.953 $\pm$ 0.012 | 0.095 $\pm$ 0.028   |
|                   | 0.400    | 0.404          | 0.050 | 0.969 $\pm$ 0.012 | 0.094 $\pm$ 0.015   | 0.976 $\pm$ 0.012 | 0.212 $\pm$ 0.038   |
|                   | 0.400    | 0.408          | 0.050 | 0.986 $\pm$ 0.012 | 0.253 $\pm$ 0.029   | 0.989 $\pm$ 0.012 | 0.386 $\pm$ 0.041   |
|                   | 0.100    | 0.100          | 0.100 | 0.887 $\pm$ 0.024 | 0.088 $\pm$ 0.036   | 0.919 $\pm$ 0.025 | 0.309 $\pm$ 0.063   |
|                   | 0.100    | 0.104          | 0.100 | 0.906 $\pm$ 0.024 | 0.107 $\pm$ 0.038   | 0.936 $\pm$ 0.025 | 0.346 $\pm$ 0.064   |
|                   | 0.100    | 0.108          | 0.100 | 0.926 $\pm$ 0.024 | 0.135 $\pm$ 0.041   | 0.953 $\pm$ 0.025 | 0.388 $\pm$ 0.063   |
|                   | 0.200    | 0.200          | 0.100 | 0.903 $\pm$ 0.007 | 0.032 $\pm$ 0.005   | 0.915 $\pm$ 0.009 | 0.110 $\pm$ 0.036   |
|                   | 0.200    | 0.204          | 0.100 | 0.927 $\pm$ 0.005 | 0.047 $\pm$ 0.012   | 0.942 $\pm$ 0.007 | 0.153 $\pm$ 0.040   |
|                   | 0.200    | 0.208          | 0.100 | 0.952 $\pm$ 0.005 | 0.075 $\pm$ 0.018   | 0.967 $\pm$ 0.005 | 0.216 $\pm$ 0.044   |
|                   | 0.400    | 0.400          | 0.100 | 0.901 $\pm$ 0.012 | 0.030 $\pm$ 0.008   | 0.901 $\pm$ 0.012 | 0.030 $\pm$ 0.008   |
|                   | 0.400    | 0.404          | 0.100 | 0.926 $\pm$ 0.012 | 0.034 $\pm$ 0.008   | 0.927 $\pm$ 0.012 | 0.037 $\pm$ 0.009   |
|                   | 0.400    | 0.408          | 0.100 | 0.957 $\pm$ 0.012 | 0.054 $\pm$ 0.008   | 0.960 $\pm$ 0.012 | 0.081 $\pm$ 0.016   |

**Open Category Detection with PAC Guarantees**

*Table 18.* Recall & False Positive Rate for page.blocks Dataset using Iforest for varying  $q$  (target recall  $1 - q$ )

| Dataset               |          |                |       | Basic CDF         |                     | Iso CDF           |                     |
|-----------------------|----------|----------------|-------|-------------------|---------------------|-------------------|---------------------|
|                       | $\alpha$ | $\hat{\alpha}$ | $q$   | Recall            | False Positive Rate | Recall            | False Positive Rate |
|                       |          |                |       | recall $\pm$ CI   | FPR $\pm$ CI        | recall $\pm$ CI   | FPR $\pm$ CI        |
| page.blocks<br>n=4912 | 0.100    | 0.100          | 0.020 | 0.951 $\pm$ 0.029 | 0.269 $\pm$ 0.106   | 0.975 $\pm$ 0.017 | 0.511 $\pm$ 0.220   |
|                       | 0.100    | 0.104          | 0.020 | 0.968 $\pm$ 0.018 | 0.314 $\pm$ 0.130   | 0.991 $\pm$ 0.007 | 0.641 $\pm$ 0.184   |
|                       | 0.100    | 0.108          | 0.020 | 0.976 $\pm$ 0.013 | 0.366 $\pm$ 0.138   | 0.994 $\pm$ 0.005 | 0.692 $\pm$ 0.175   |
|                       | 0.200    | 0.200          | 0.020 | 0.965 $\pm$ 0.005 | 0.283 $\pm$ 0.030   | 0.976 $\pm$ 0.005 | 0.443 $\pm$ 0.052   |
|                       | 0.200    | 0.204          | 0.020 | 0.979 $\pm$ 0.004 | 0.366 $\pm$ 0.037   | 0.986 $\pm$ 0.004 | 0.527 $\pm$ 0.051   |
|                       | 0.200    | 0.208          | 0.020 | 0.989 $\pm$ 0.002 | 0.465 $\pm$ 0.041   | 0.994 $\pm$ 0.002 | 0.622 $\pm$ 0.046   |
|                       | 0.400    | 0.400          | 0.020 | 0.970 $\pm$ 0.004 | 0.260 $\pm$ 0.028   | 0.978 $\pm$ 0.004 | 0.403 $\pm$ 0.049   |
|                       | 0.400    | 0.404          | 0.020 | 0.985 $\pm$ 0.002 | 0.381 $\pm$ 0.035   | 0.990 $\pm$ 0.002 | 0.531 $\pm$ 0.048   |
|                       | 0.400    | 0.408          | 0.020 | 0.995 $\pm$ 0.001 | 0.530 $\pm$ 0.039   | 0.996 $\pm$ 0.001 | 0.655 $\pm$ 0.042   |
|                       | 0.100    | 0.100          | 0.050 | 0.949 $\pm$ 0.025 | 0.239 $\pm$ 0.096   | 0.968 $\pm$ 0.022 | 0.401 $\pm$ 0.176   |
|                       | 0.100    | 0.104          | 0.050 | 0.958 $\pm$ 0.021 | 0.261 $\pm$ 0.101   | 0.975 $\pm$ 0.018 | 0.448 $\pm$ 0.189   |
|                       | 0.100    | 0.108          | 0.050 | 0.969 $\pm$ 0.018 | 0.297 $\pm$ 0.117   | 0.986 $\pm$ 0.012 | 0.529 $\pm$ 0.179   |
|                       | 0.200    | 0.200          | 0.050 | 0.946 $\pm$ 0.007 | 0.207 $\pm$ 0.019   | 0.956 $\pm$ 0.007 | 0.298 $\pm$ 0.040   |
|                       | 0.200    | 0.204          | 0.050 | 0.962 $\pm$ 0.005 | 0.258 $\pm$ 0.025   | 0.971 $\pm$ 0.005 | 0.364 $\pm$ 0.042   |
|                       | 0.200    | 0.208          | 0.050 | 0.978 $\pm$ 0.004 | 0.338 $\pm$ 0.031   | 0.984 $\pm$ 0.003 | 0.446 $\pm$ 0.042   |
|                       | 0.400    | 0.400          | 0.050 | 0.945 $\pm$ 0.005 | 0.173 $\pm$ 0.013   | 0.951 $\pm$ 0.005 | 0.215 $\pm$ 0.027   |
|                       | 0.400    | 0.404          | 0.050 | 0.966 $\pm$ 0.003 | 0.228 $\pm$ 0.019   | 0.972 $\pm$ 0.004 | 0.299 $\pm$ 0.034   |
|                       | 0.400    | 0.408          | 0.050 | 0.985 $\pm$ 0.002 | 0.339 $\pm$ 0.028   | 0.989 $\pm$ 0.002 | 0.424 $\pm$ 0.037   |
|                       | 0.100    | 0.100          | 0.100 | 0.903 $\pm$ 0.035 | 0.155 $\pm$ 0.040   | 0.927 $\pm$ 0.030 | 0.216 $\pm$ 0.111   |
|                       | 0.100    | 0.104          | 0.100 | 0.927 $\pm$ 0.025 | 0.177 $\pm$ 0.044   | 0.948 $\pm$ 0.027 | 0.248 $\pm$ 0.117   |
|                       | 0.100    | 0.108          | 0.100 | 0.951 $\pm$ 0.024 | 0.222 $\pm$ 0.068   | 0.962 $\pm$ 0.022 | 0.317 $\pm$ 0.123   |
|                       | 0.200    | 0.200          | 0.100 | 0.900 $\pm$ 0.007 | 0.138 $\pm$ 0.006   | 0.906 $\pm$ 0.008 | 0.158 $\pm$ 0.016   |
|                       | 0.200    | 0.204          | 0.100 | 0.922 $\pm$ 0.007 | 0.160 $\pm$ 0.010   | 0.930 $\pm$ 0.007 | 0.192 $\pm$ 0.020   |
|                       | 0.200    | 0.208          | 0.100 | 0.947 $\pm$ 0.006 | 0.201 $\pm$ 0.016   | 0.955 $\pm$ 0.006 | 0.246 $\pm$ 0.027   |
|                       | 0.400    | 0.400          | 0.100 | 0.900 $\pm$ 0.005 | 0.128 $\pm$ 0.004   | 0.902 $\pm$ 0.006 | 0.130 $\pm$ 0.006   |
|                       | 0.400    | 0.404          | 0.100 | 0.922 $\pm$ 0.004 | 0.143 $\pm$ 0.006   | 0.924 $\pm$ 0.004 | 0.147 $\pm$ 0.008   |
|                       | 0.400    | 0.408          | 0.100 | 0.948 $\pm$ 0.004 | 0.174 $\pm$ 0.008   | 0.951 $\pm$ 0.004 | 0.190 $\pm$ 0.014   |

Open Category Detection with PAC Guarantees

Table 19. Recall & False Positive Rate for Optical.digits Dataset using Iforest for varying  $q$  (target recall  $1 - q$ )

| Dataset                 |          |                |       | Basic CDF         |                     | Iso CDF           |                     |
|-------------------------|----------|----------------|-------|-------------------|---------------------|-------------------|---------------------|
|                         | $\alpha$ | $\hat{\alpha}$ | $q$   | Recall            | False Positive Rate | Recall            | False Positive Rate |
|                         |          |                |       | recall $\pm$ CI   | FPR $\pm$ CI        | recall $\pm$ CI   | FPR $\pm$ CI        |
| Optical.digits<br>n=568 | 0.100    | 0.100          | 0.020 | 0.891 $\pm$ 0.018 | 0.172 $\pm$ 0.036   | 0.940 $\pm$ 0.017 | 0.504 $\pm$ 0.068   |
|                         | 0.100    | 0.104          | 0.020 | 0.904 $\pm$ 0.013 | 0.191 $\pm$ 0.036   | 0.952 $\pm$ 0.012 | 0.521 $\pm$ 0.066   |
|                         | 0.100    | 0.108          | 0.020 | 0.917 $\pm$ 0.012 | 0.214 $\pm$ 0.037   | 0.961 $\pm$ 0.011 | 0.548 $\pm$ 0.065   |
|                         | 0.200    | 0.200          | 0.020 | 0.941 $\pm$ 0.010 | 0.178 $\pm$ 0.032   | 0.964 $\pm$ 0.010 | 0.424 $\pm$ 0.065   |
|                         | 0.200    | 0.204          | 0.020 | 0.951 $\pm$ 0.008 | 0.218 $\pm$ 0.037   | 0.974 $\pm$ 0.008 | 0.465 $\pm$ 0.064   |
|                         | 0.200    | 0.208          | 0.020 | 0.965 $\pm$ 0.007 | 0.268 $\pm$ 0.040   | 0.983 $\pm$ 0.006 | 0.520 $\pm$ 0.063   |
|                         | 0.400    | 0.400          | 0.020 | 0.968 $\pm$ 0.006 | 0.250 $\pm$ 0.039   | 0.978 $\pm$ 0.006 | 0.451 $\pm$ 0.061   |
|                         | 0.400    | 0.404          | 0.020 | 0.979 $\pm$ 0.004 | 0.338 $\pm$ 0.045   | 0.986 $\pm$ 0.004 | 0.519 $\pm$ 0.058   |
|                         | 0.400    | 0.408          | 0.020 | 0.990 $\pm$ 0.003 | 0.442 $\pm$ 0.047   | 0.994 $\pm$ 0.002 | 0.608 $\pm$ 0.054   |
|                         | 0.100    | 0.100          | 0.050 | 0.882 $\pm$ 0.018 | 0.148 $\pm$ 0.033   | 0.933 $\pm$ 0.018 | 0.462 $\pm$ 0.068   |
|                         | 0.100    | 0.104          | 0.050 | 0.896 $\pm$ 0.014 | 0.164 $\pm$ 0.034   | 0.945 $\pm$ 0.013 | 0.481 $\pm$ 0.066   |
|                         | 0.100    | 0.108          | 0.050 | 0.910 $\pm$ 0.013 | 0.192 $\pm$ 0.036   | 0.952 $\pm$ 0.012 | 0.500 $\pm$ 0.065   |
|                         | 0.200    | 0.200          | 0.050 | 0.920 $\pm$ 0.012 | 0.139 $\pm$ 0.026   | 0.953 $\pm$ 0.012 | 0.365 $\pm$ 0.061   |
|                         | 0.200    | 0.204          | 0.050 | 0.938 $\pm$ 0.009 | 0.168 $\pm$ 0.030   | 0.964 $\pm$ 0.009 | 0.386 $\pm$ 0.059   |
|                         | 0.200    | 0.208          | 0.050 | 0.954 $\pm$ 0.008 | 0.211 $\pm$ 0.034   | 0.973 $\pm$ 0.008 | 0.441 $\pm$ 0.060   |
|                         | 0.400    | 0.400          | 0.050 | 0.946 $\pm$ 0.007 | 0.149 $\pm$ 0.024   | 0.960 $\pm$ 0.007 | 0.288 $\pm$ 0.050   |
|                         | 0.400    | 0.404          | 0.050 | 0.963 $\pm$ 0.005 | 0.220 $\pm$ 0.033   | 0.974 $\pm$ 0.005 | 0.357 $\pm$ 0.049   |
|                         | 0.400    | 0.408          | 0.050 | 0.979 $\pm$ 0.004 | 0.315 $\pm$ 0.039   | 0.986 $\pm$ 0.004 | 0.443 $\pm$ 0.049   |
|                         | 0.100    | 0.100          | 0.100 | 0.856 $\pm$ 0.017 | 0.113 $\pm$ 0.027   | 0.920 $\pm$ 0.018 | 0.387 $\pm$ 0.066   |
|                         | 0.100    | 0.104          | 0.100 | 0.867 $\pm$ 0.015 | 0.127 $\pm$ 0.030   | 0.928 $\pm$ 0.016 | 0.407 $\pm$ 0.065   |
|                         | 0.100    | 0.108          | 0.100 | 0.886 $\pm$ 0.014 | 0.146 $\pm$ 0.031   | 0.938 $\pm$ 0.014 | 0.433 $\pm$ 0.064   |
|                         | 0.200    | 0.200          | 0.100 | 0.883 $\pm$ 0.012 | 0.083 $\pm$ 0.014   | 0.917 $\pm$ 0.014 | 0.227 $\pm$ 0.050   |
|                         | 0.200    | 0.204          | 0.100 | 0.907 $\pm$ 0.010 | 0.106 $\pm$ 0.018   | 0.935 $\pm$ 0.011 | 0.264 $\pm$ 0.049   |
|                         | 0.200    | 0.208          | 0.100 | 0.927 $\pm$ 0.009 | 0.140 $\pm$ 0.025   | 0.953 $\pm$ 0.009 | 0.305 $\pm$ 0.050   |
|                         | 0.400    | 0.400          | 0.100 | 0.899 $\pm$ 0.008 | 0.071 $\pm$ 0.005   | 0.911 $\pm$ 0.009 | 0.123 $\pm$ 0.024   |
|                         | 0.400    | 0.404          | 0.100 | 0.926 $\pm$ 0.005 | 0.097 $\pm$ 0.009   | 0.937 $\pm$ 0.007 | 0.163 $\pm$ 0.030   |
|                         | 0.400    | 0.408          | 0.100 | 0.952 $\pm$ 0.005 | 0.151 $\pm$ 0.018   | 0.961 $\pm$ 0.006 | 0.230 $\pm$ 0.035   |

Open Category Detection with PAC Guarantees

Table 20. Recall & False Positive Rate for Letter Recognition Dataset using Iforest for varying  $q$  (target recall  $1 - q$ )

| Dataset               |          |                |       | Basic CDF         |                     | Iso CDF           |                     |
|-----------------------|----------|----------------|-------|-------------------|---------------------|-------------------|---------------------|
|                       | $\alpha$ | $\hat{\alpha}$ | $q$   | Recall            | False Positive Rate | Recall            | False Positive Rate |
|                       |          |                |       | recall $\pm$ CI   | FPR $\pm$ CI        | recall $\pm$ CI   | FPR $\pm$ CI        |
| Letter recog<br>n=788 | 0.100    | 0.100          | 0.020 | 0.911 $\pm$ 0.016 | 0.234 $\pm$ 0.044   | 0.960 $\pm$ 0.013 | 0.588 $\pm$ 0.070   |
|                       | 0.100    | 0.104          | 0.020 | 0.919 $\pm$ 0.013 | 0.262 $\pm$ 0.046   | 0.965 $\pm$ 0.011 | 0.603 $\pm$ 0.067   |
|                       | 0.100    | 0.108          | 0.020 | 0.931 $\pm$ 0.012 | 0.297 $\pm$ 0.048   | 0.973 $\pm$ 0.009 | 0.627 $\pm$ 0.065   |
|                       | 0.200    | 0.200          | 0.020 | 0.936 $\pm$ 0.011 | 0.203 $\pm$ 0.034   | 0.961 $\pm$ 0.011 | 0.444 $\pm$ 0.065   |
|                       | 0.200    | 0.204          | 0.020 | 0.954 $\pm$ 0.008 | 0.236 $\pm$ 0.036   | 0.975 $\pm$ 0.008 | 0.487 $\pm$ 0.064   |
|                       | 0.200    | 0.208          | 0.020 | 0.968 $\pm$ 0.007 | 0.288 $\pm$ 0.042   | 0.983 $\pm$ 0.006 | 0.534 $\pm$ 0.062   |
|                       | 0.400    | 0.400          | 0.020 | 0.971 $\pm$ 0.005 | 0.240 $\pm$ 0.029   | 0.979 $\pm$ 0.005 | 0.429 $\pm$ 0.057   |
|                       | 0.400    | 0.404          | 0.020 | 0.984 $\pm$ 0.004 | 0.334 $\pm$ 0.039   | 0.989 $\pm$ 0.003 | 0.525 $\pm$ 0.054   |
|                       | 0.400    | 0.408          | 0.020 | 0.993 $\pm$ 0.003 | 0.448 $\pm$ 0.044   | 0.996 $\pm$ 0.002 | 0.636 $\pm$ 0.048   |
|                       | 0.100    | 0.100          | 0.050 | 0.884 $\pm$ 0.019 | 0.208 $\pm$ 0.041   | 0.949 $\pm$ 0.017 | 0.552 $\pm$ 0.069   |
|                       | 0.100    | 0.104          | 0.050 | 0.903 $\pm$ 0.015 | 0.223 $\pm$ 0.041   | 0.959 $\pm$ 0.012 | 0.563 $\pm$ 0.067   |
|                       | 0.100    | 0.108          | 0.050 | 0.918 $\pm$ 0.014 | 0.252 $\pm$ 0.043   | 0.966 $\pm$ 0.011 | 0.582 $\pm$ 0.065   |
|                       | 0.200    | 0.200          | 0.050 | 0.915 $\pm$ 0.013 | 0.162 $\pm$ 0.025   | 0.943 $\pm$ 0.013 | 0.376 $\pm$ 0.062   |
|                       | 0.200    | 0.204          | 0.050 | 0.936 $\pm$ 0.009 | 0.190 $\pm$ 0.029   | 0.960 $\pm$ 0.009 | 0.410 $\pm$ 0.060   |
|                       | 0.200    | 0.208          | 0.050 | 0.955 $\pm$ 0.008 | 0.231 $\pm$ 0.034   | 0.974 $\pm$ 0.007 | 0.455 $\pm$ 0.059   |
|                       | 0.400    | 0.400          | 0.050 | 0.944 $\pm$ 0.007 | 0.152 $\pm$ 0.013   | 0.954 $\pm$ 0.007 | 0.250 $\pm$ 0.040   |
|                       | 0.400    | 0.404          | 0.050 | 0.966 $\pm$ 0.005 | 0.208 $\pm$ 0.019   | 0.974 $\pm$ 0.005 | 0.328 $\pm$ 0.042   |
|                       | 0.400    | 0.408          | 0.050 | 0.984 $\pm$ 0.004 | 0.307 $\pm$ 0.031   | 0.988 $\pm$ 0.004 | 0.435 $\pm$ 0.046   |
|                       | 0.100    | 0.100          | 0.100 | 0.862 $\pm$ 0.020 | 0.160 $\pm$ 0.034   | 0.930 $\pm$ 0.019 | 0.475 $\pm$ 0.067   |
|                       | 0.100    | 0.104          | 0.100 | 0.876 $\pm$ 0.018 | 0.174 $\pm$ 0.034   | 0.939 $\pm$ 0.016 | 0.492 $\pm$ 0.066   |
|                       | 0.100    | 0.108          | 0.100 | 0.891 $\pm$ 0.016 | 0.198 $\pm$ 0.036   | 0.951 $\pm$ 0.013 | 0.512 $\pm$ 0.065   |
|                       | 0.200    | 0.200          | 0.100 | 0.879 $\pm$ 0.013 | 0.113 $\pm$ 0.016   | 0.906 $\pm$ 0.014 | 0.238 $\pm$ 0.047   |
|                       | 0.200    | 0.204          | 0.100 | 0.899 $\pm$ 0.011 | 0.132 $\pm$ 0.019   | 0.928 $\pm$ 0.012 | 0.281 $\pm$ 0.049   |
|                       | 0.200    | 0.208          | 0.100 | 0.922 $\pm$ 0.010 | 0.160 $\pm$ 0.022   | 0.949 $\pm$ 0.010 | 0.324 $\pm$ 0.050   |
|                       | 0.400    | 0.400          | 0.100 | 0.902 $\pm$ 0.007 | 0.098 $\pm$ 0.004   | 0.907 $\pm$ 0.007 | 0.110 $\pm$ 0.009   |
|                       | 0.400    | 0.404          | 0.100 | 0.924 $\pm$ 0.006 | 0.117 $\pm$ 0.005   | 0.931 $\pm$ 0.006 | 0.139 $\pm$ 0.013   |
|                       | 0.400    | 0.408          | 0.100 | 0.951 $\pm$ 0.006 | 0.154 $\pm$ 0.010   | 0.959 $\pm$ 0.006 | 0.203 $\pm$ 0.024   |

**Open Category Detection with PAC Guarantees**

---

Table 21. Recall & False Positive Rate for Shuttle Dataset using Iforest for varying  $q$  (target recall  $1 - q$ )

| Dataset           |          |                |       | Basic CDF         |                     | Iso CDF           |                     |
|-------------------|----------|----------------|-------|-------------------|---------------------|-------------------|---------------------|
|                   | $\alpha$ | $\hat{\alpha}$ | $q$   | Recall            | False Positive Rate | Recall            | False Positive Rate |
|                   |          |                |       | recall $\pm$ CI   | FPR $\pm$ CI        | recall $\pm$ CI   | FPR $\pm$ CI        |
| Shuttle<br>n=5000 | 0.100    | 0.100          | 0.020 | 0.959 $\pm$ 0.008 | 0.147 $\pm$ 0.031   | 0.974 $\pm$ 0.007 | 0.419 $\pm$ 0.066   |
|                   | 0.100    | 0.104          | 0.020 | 0.972 $\pm$ 0.006 | 0.206 $\pm$ 0.039   | 0.985 $\pm$ 0.005 | 0.490 $\pm$ 0.065   |
|                   | 0.100    | 0.108          | 0.020 | 0.984 $\pm$ 0.004 | 0.287 $\pm$ 0.047   | 0.991 $\pm$ 0.003 | 0.545 $\pm$ 0.064   |
|                   | 0.200    | 0.200          | 0.020 | 0.975 $\pm$ 0.004 | 0.103 $\pm$ 0.016   | 0.983 $\pm$ 0.004 | 0.326 $\pm$ 0.058   |
|                   | 0.200    | 0.204          | 0.020 | 0.990 $\pm$ 0.002 | 0.192 $\pm$ 0.033   | 0.994 $\pm$ 0.002 | 0.457 $\pm$ 0.058   |
|                   | 0.200    | 0.208          | 0.020 | 0.998 $\pm$ 0.001 | 0.361 $\pm$ 0.043   | 0.999 $\pm$ 0.001 | 0.572 $\pm$ 0.053   |
|                   | 0.400    | 0.400          | 0.020 | 0.979 $\pm$ 0.002 | 0.089 $\pm$ 0.013   | 0.981 $\pm$ 0.002 | 0.151 $\pm$ 0.030   |
|                   | 0.400    | 0.404          | 0.020 | 0.996 $\pm$ 0.001 | 0.237 $\pm$ 0.028   | 0.997 $\pm$ 0.001 | 0.394 $\pm$ 0.042   |
|                   | 0.400    | 0.408          | 0.020 | 1.000 $\pm$ 0.000 | 0.541 $\pm$ 0.032   | 1.000 $\pm$ 0.000 | 0.642 $\pm$ 0.034   |
|                   | 0.100    | 0.100          | 0.050 | 0.941 $\pm$ 0.009 | 0.097 $\pm$ 0.018   | 0.956 $\pm$ 0.009 | 0.319 $\pm$ 0.059   |
|                   | 0.100    | 0.104          | 0.050 | 0.957 $\pm$ 0.008 | 0.135 $\pm$ 0.027   | 0.971 $\pm$ 0.007 | 0.371 $\pm$ 0.059   |
|                   | 0.100    | 0.108          | 0.050 | 0.973 $\pm$ 0.006 | 0.202 $\pm$ 0.037   | 0.984 $\pm$ 0.005 | 0.439 $\pm$ 0.060   |
|                   | 0.200    | 0.200          | 0.050 | 0.949 $\pm$ 0.005 | 0.063 $\pm$ 0.004   | 0.957 $\pm$ 0.005 | 0.150 $\pm$ 0.035   |
|                   | 0.200    | 0.204          | 0.050 | 0.973 $\pm$ 0.004 | 0.093 $\pm$ 0.011   | 0.979 $\pm$ 0.004 | 0.221 $\pm$ 0.042   |
|                   | 0.200    | 0.208          | 0.050 | 0.992 $\pm$ 0.002 | 0.187 $\pm$ 0.028   | 0.995 $\pm$ 0.002 | 0.368 $\pm$ 0.044   |
|                   | 0.400    | 0.400          | 0.050 | 0.948 $\pm$ 0.002 | 0.060 $\pm$ 0.002   | 0.949 $\pm$ 0.002 | 0.061 $\pm$ 0.002   |
|                   | 0.400    | 0.404          | 0.050 | 0.976 $\pm$ 0.002 | 0.083 $\pm$ 0.006   | 0.977 $\pm$ 0.002 | 0.106 $\pm$ 0.016   |
|                   | 0.400    | 0.408          | 0.050 | 0.997 $\pm$ 0.001 | 0.218 $\pm$ 0.022   | 0.998 $\pm$ 0.001 | 0.291 $\pm$ 0.027   |
|                   | 0.100    | 0.100          | 0.100 | 0.899 $\pm$ 0.011 | 0.057 $\pm$ 0.005   | 0.917 $\pm$ 0.013 | 0.180 $\pm$ 0.046   |
|                   | 0.100    | 0.104          | 0.100 | 0.923 $\pm$ 0.010 | 0.073 $\pm$ 0.010   | 0.938 $\pm$ 0.011 | 0.211 $\pm$ 0.047   |
|                   | 0.100    | 0.108          | 0.100 | 0.946 $\pm$ 0.009 | 0.104 $\pm$ 0.018   | 0.960 $\pm$ 0.009 | 0.273 $\pm$ 0.050   |
|                   | 0.200    | 0.200          | 0.100 | 0.902 $\pm$ 0.005 | 0.047 $\pm$ 0.001   | 0.904 $\pm$ 0.005 | 0.048 $\pm$ 0.001   |
|                   | 0.200    | 0.204          | 0.100 | 0.928 $\pm$ 0.004 | 0.054 $\pm$ 0.001   | 0.931 $\pm$ 0.004 | 0.066 $\pm$ 0.009   |
|                   | 0.200    | 0.208          | 0.100 | 0.958 $\pm$ 0.004 | 0.069 $\pm$ 0.004   | 0.963 $\pm$ 0.004 | 0.114 $\pm$ 0.020   |
|                   | 0.400    | 0.400          | 0.100 | 0.899 $\pm$ 0.002 | 0.049 $\pm$ 0.001   | 0.899 $\pm$ 0.002 | 0.049 $\pm$ 0.001   |
|                   | 0.400    | 0.404          | 0.100 | 0.925 $\pm$ 0.002 | 0.054 $\pm$ 0.001   | 0.926 $\pm$ 0.002 | 0.054 $\pm$ 0.001   |
|                   | 0.400    | 0.408          | 0.100 | 0.958 $\pm$ 0.002 | 0.065 $\pm$ 0.001   | 0.959 $\pm$ 0.002 | 0.066 $\pm$ 0.001   |

Open Category Detection with PAC Guarantees

Table 22. Recall & False Positive Rate for Coverttype Dataset using Iforest for varying  $q$  (target recall  $1 - q$ )

| Dataset               | $\alpha$ $\hat{\alpha}$ $q$ |       |       | Basic CDF         |                     | Iso CDF           |                     |
|-----------------------|-----------------------------|-------|-------|-------------------|---------------------|-------------------|---------------------|
|                       |                             |       |       | Recall            | False Positive Rate | Recall            | False Positive Rate |
|                       |                             |       |       | recall $\pm$ CI   | FPR $\pm$ CI        | recall $\pm$ CI   | FPR $\pm$ CI        |
| Coverttype<br>n=13624 | 0.100                       | 0.100 | 0.020 | 0.979 $\pm$ 0.002 | 0.012 $\pm$ 0.007   | 0.989 $\pm$ 0.002 | 0.359 $\pm$ 0.072   |
|                       | 0.100                       | 0.104 | 0.020 | 0.995 $\pm$ 0.001 | 0.095 $\pm$ 0.025   | 0.998 $\pm$ 0.001 | 0.479 $\pm$ 0.067   |
|                       | 0.100                       | 0.108 | 0.020 | 0.999 $\pm$ 0.000 | 0.292 $\pm$ 0.045   | 0.999 $\pm$ 0.000 | 0.586 $\pm$ 0.059   |
|                       | 0.200                       | 0.200 | 0.020 | 0.980 $\pm$ 0.001 | 0.006 $\pm$ 0.002   | 0.986 $\pm$ 0.002 | 0.211 $\pm$ 0.055   |
|                       | 0.200                       | 0.204 | 0.020 | 0.998 $\pm$ 0.000 | 0.143 $\pm$ 0.027   | 0.999 $\pm$ 0.000 | 0.420 $\pm$ 0.058   |
|                       | 0.200                       | 0.208 | 0.020 | 1.000 $\pm$ 0.000 | 0.427 $\pm$ 0.043   | 1.000 $\pm$ 0.000 | 0.615 $\pm$ 0.047   |
|                       | 0.400                       | 0.400 | 0.020 | 0.981 $\pm$ 0.001 | 0.010 $\pm$ 0.001   | 0.985 $\pm$ 0.002 | 0.136 $\pm$ 0.044   |
|                       | 0.400                       | 0.404 | 0.020 | 0.998 $\pm$ 0.000 | 0.206 $\pm$ 0.030   | 0.999 $\pm$ 0.000 | 0.437 $\pm$ 0.051   |
|                       | 0.400                       | 0.408 | 0.020 | 1.000 $\pm$ 0.000 | 0.555 $\pm$ 0.038   | 1.000 $\pm$ 0.000 | 0.677 $\pm$ 0.036   |
|                       | 0.100                       | 0.100 | 0.050 | 0.950 $\pm$ 0.002 | 0.002 $\pm$ 0.000   | 0.962 $\pm$ 0.004 | 0.166 $\pm$ 0.051   |
|                       | 0.100                       | 0.104 | 0.050 | 0.978 $\pm$ 0.001 | 0.012 $\pm$ 0.004   | 0.987 $\pm$ 0.002 | 0.276 $\pm$ 0.058   |
|                       | 0.100                       | 0.108 | 0.050 | 0.997 $\pm$ 0.001 | 0.110 $\pm$ 0.025   | 0.998 $\pm$ 0.000 | 0.409 $\pm$ 0.060   |
|                       | 0.200                       | 0.200 | 0.050 | 0.950 $\pm$ 0.001 | 0.003 $\pm$ 0.000   | 0.952 $\pm$ 0.002 | 0.018 $\pm$ 0.014   |
|                       | 0.200                       | 0.204 | 0.050 | 0.980 $\pm$ 0.001 | 0.008 $\pm$ 0.002   | 0.983 $\pm$ 0.001 | 0.115 $\pm$ 0.035   |
|                       | 0.200                       | 0.208 | 0.050 | 0.999 $\pm$ 0.000 | 0.154 $\pm$ 0.026   | 1.000 $\pm$ 0.000 | 0.319 $\pm$ 0.045   |
|                       | 0.400                       | 0.400 | 0.050 | 0.951 $\pm$ 0.001 | 0.006 $\pm$ 0.000   | 0.951 $\pm$ 0.001 | 0.006 $\pm$ 0.000   |
|                       | 0.400                       | 0.404 | 0.050 | 0.980 $\pm$ 0.001 | 0.012 $\pm$ 0.002   | 0.981 $\pm$ 0.001 | 0.050 $\pm$ 0.015   |
|                       | 0.400                       | 0.408 | 0.050 | 0.999 $\pm$ 0.000 | 0.200 $\pm$ 0.022   | 1.000 $\pm$ 0.000 | 0.310 $\pm$ 0.034   |
|                       | 0.100                       | 0.100 | 0.100 | 0.901 $\pm$ 0.002 | 0.002 $\pm$ 0.000   | 0.905 $\pm$ 0.004 | 0.028 $\pm$ 0.022   |
|                       | 0.100                       | 0.104 | 0.100 | 0.930 $\pm$ 0.001 | 0.002 $\pm$ 0.000   | 0.937 $\pm$ 0.004 | 0.055 $\pm$ 0.029   |
|                       | 0.100                       | 0.108 | 0.100 | 0.965 $\pm$ 0.001 | 0.004 $\pm$ 0.001   | 0.973 $\pm$ 0.003 | 0.123 $\pm$ 0.038   |
|                       | 0.200                       | 0.200 | 0.100 | 0.902 $\pm$ 0.002 | 0.002 $\pm$ 0.000   | 0.902 $\pm$ 0.002 | 0.002 $\pm$ 0.000   |
|                       | 0.200                       | 0.204 | 0.100 | 0.929 $\pm$ 0.001 | 0.002 $\pm$ 0.000   | 0.929 $\pm$ 0.001 | 0.002 $\pm$ 0.000   |
|                       | 0.200                       | 0.208 | 0.100 | 0.964 $\pm$ 0.001 | 0.003 $\pm$ 0.000   | 0.965 $\pm$ 0.001 | 0.011 $\pm$ 0.003   |
|                       | 0.400                       | 0.400 | 0.100 | 0.903 $\pm$ 0.001 | 0.005 $\pm$ 0.000   | 0.903 $\pm$ 0.001 | 0.005 $\pm$ 0.000   |
|                       | 0.400                       | 0.404 | 0.100 | 0.929 $\pm$ 0.001 | 0.005 $\pm$ 0.000   | 0.929 $\pm$ 0.001 | 0.005 $\pm$ 0.000   |
|                       | 0.400                       | 0.408 | 0.100 | 0.964 $\pm$ 0.001 | 0.007 $\pm$ 0.000   | 0.964 $\pm$ 0.001 | 0.007 $\pm$ 0.001   |
